# Supplementary material for: Germacrane Sesquiterpene Dilactones from Mikania micrantha and Their Antibacterial and Cytotoxic Activity
Source: MDPI journal article supplement (doi:10.3390/molecules28052119), 2023-02-24

## Supporting Information

In this ‘Supporting Information’ file for the manuscript entitled “**Germacrane sesquiterpene dilactones from *Mikania micrantha* and their antibacterial and cytotoxic activity**”, HR-ESI-MS, 1D and 2D NMR spectra of new compounds **1**, **2**, **3** and **4** are available here as listed below.

### Contents:

Page 2–8: HR-ESI-MS,  $^1\text{H}$  and  $^{13}\text{C}$  NMR, HSQC, HMBC and NOESY spectra of compound **1**.

Page 9–15: HR-ESI-MS,  $^1\text{H}$  and  $^{13}\text{C}$  NMR, HSQC, HMBC and NOESY spectra of compound **2**.

Page 16–22: HR-ESI-MS,  $^1\text{H}$  and  $^{13}\text{C}$  NMR, HSQC, HMBC and NOESY spectra of compound **3**.

Page 23–29: HR-ESI-MS,  $^1\text{H}$  and  $^{13}\text{C}$  NMR, HSQC, HMBC and NOESY spectra of compound **4**.

# HR-ESI-MS(-) of compound 1

## Mass Spectrum SmartFormula Report

### Analysis Info

Analysis Name D:\Data\MS\data\202101\donglimei\_E7-2-3-2\_neg\_33\_01\_1351.d  
 Method LC\_Direct Infusion\_neg\_100-1000mz.m Operator SCSIO  
 Sample Name donglimei\_E7-2-3-2\_neg Instrument / Ser# maXis 29  
 Comment

### Acquisition Parameter

Source Type ESI Ion Polarity Negative Set Nebulizer 0.4 Bar  
 Focus Active Set Capillary 3800 V Set Dry Heater 180 °C  
 Scan Begin 100 m/z Set End Plate Offset -500 V Set Dry Gas 4.0 l/min  
 Scan End 2000 m/z Set Collision Cell RF 550.0 Vpp Set Divert Valve Waste

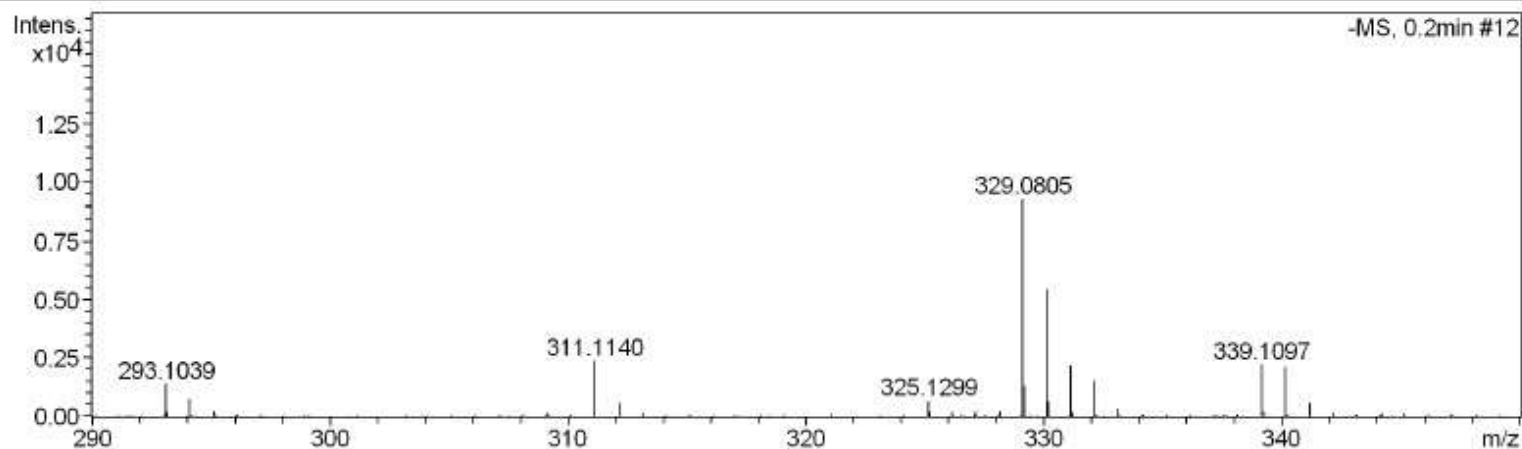

| Meas. m/z | # | Formula          | Score  | m/z      | err [ppm] | err [mDa] | mSigma | rdB | e <sup>-</sup> Conf | N-Rule |
|-----------|---|------------------|--------|----------|-----------|-----------|--------|-----|---------------------|--------|
| 293.1039  | 1 | C 15 H 17 O 6    | 100.00 | 293.1031 | -3.0      | -0.9      | 207.7  | 7.5 | even                | ok     |
| 329.0805  | 1 | C 15 H 18 Cl O 6 | 100.00 | 329.0797 | -2.4      | -0.8      | 202.6  | 6.5 | even                | ok     |

$^1\text{H}$ -NMR spectrum of compound **1**

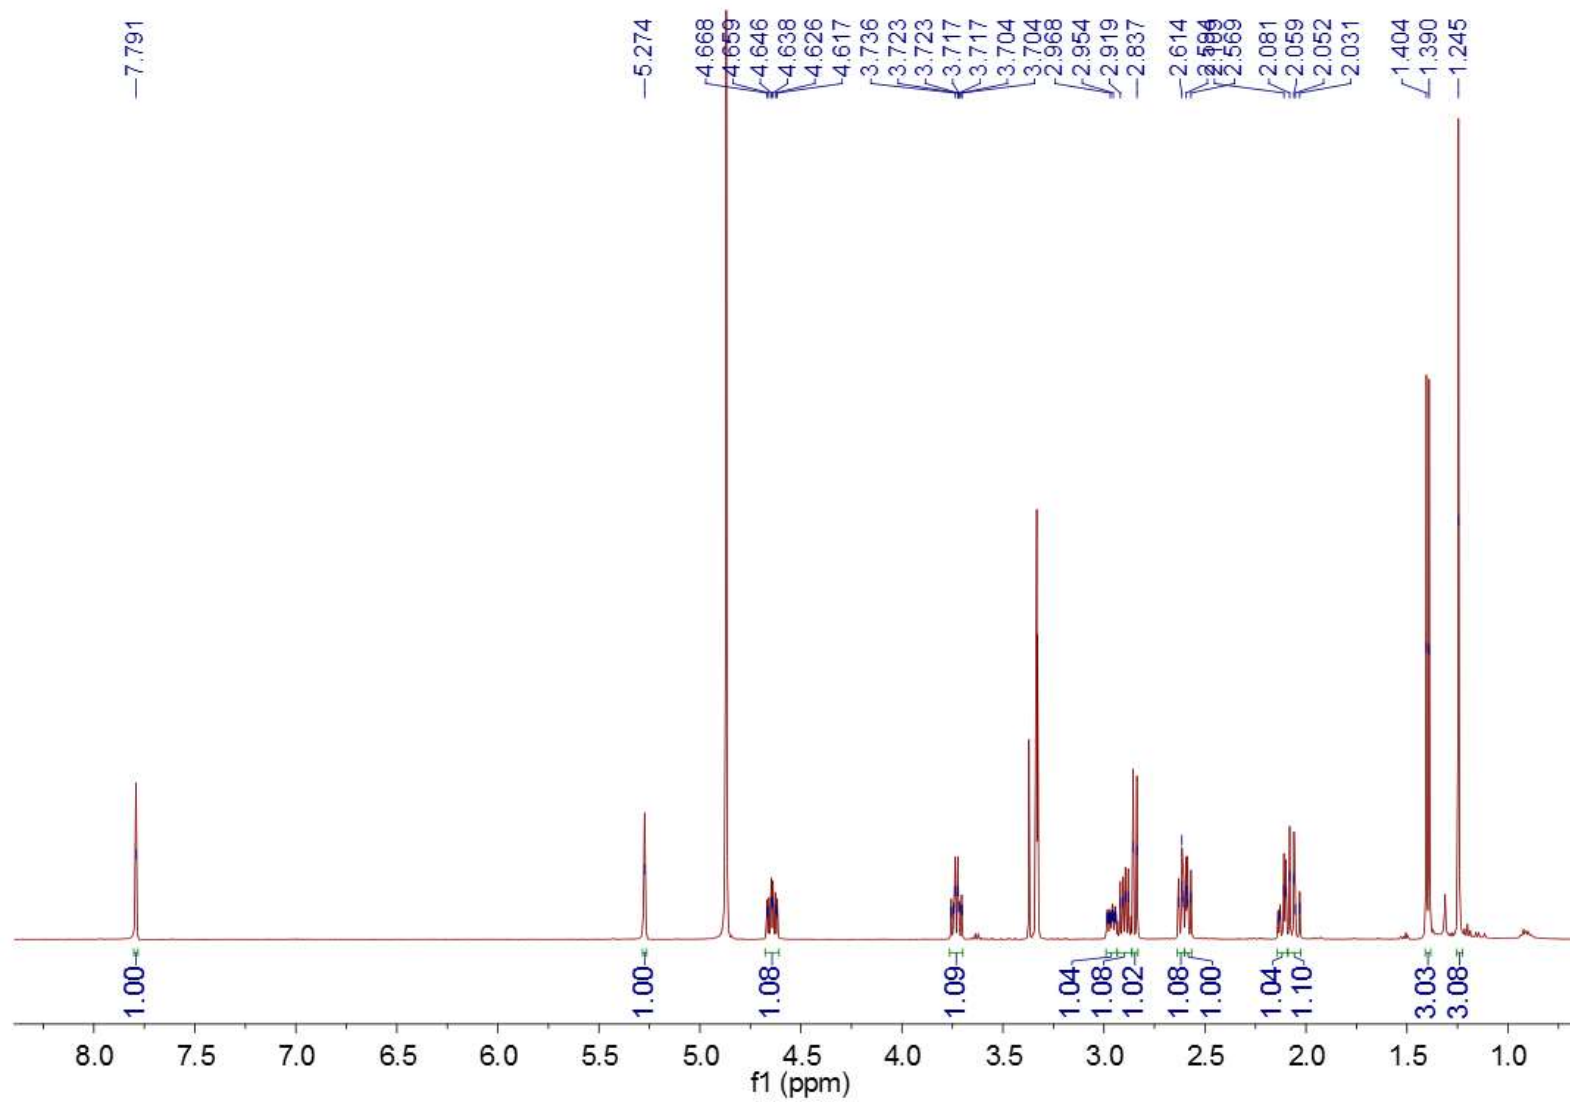

$^{13}\text{C}$ -NMR spectrum of compound **1**

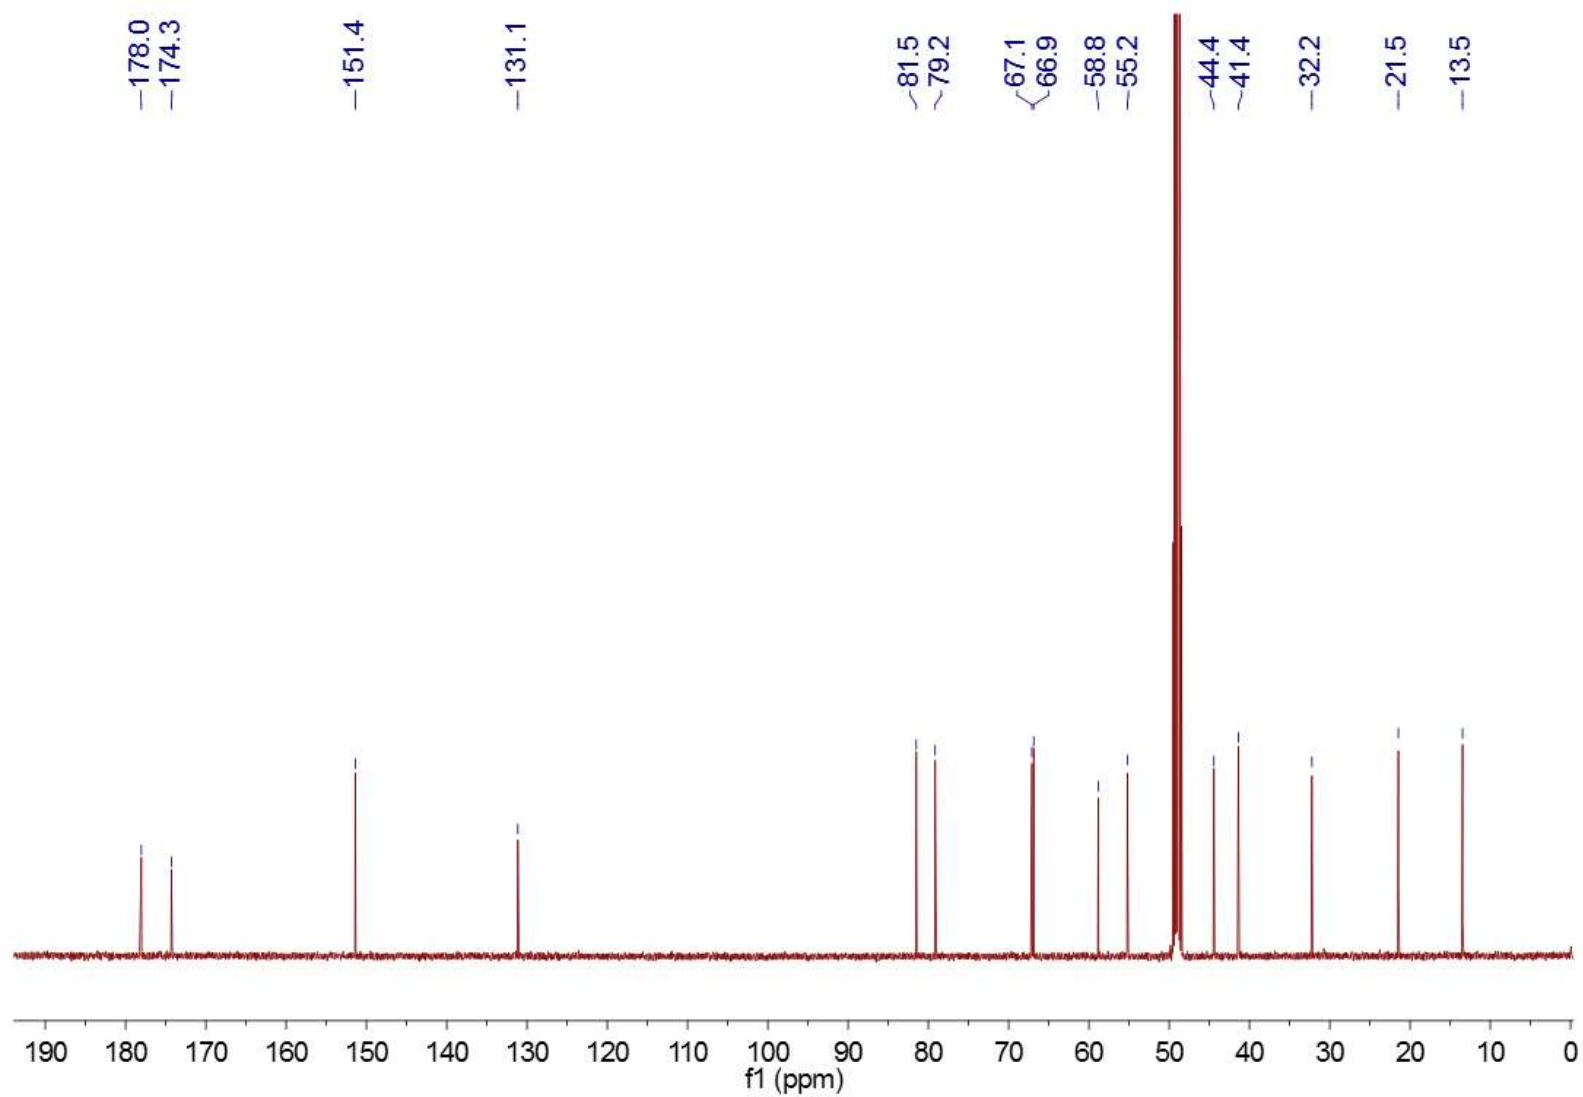

# HSQC spectrum of compound 1

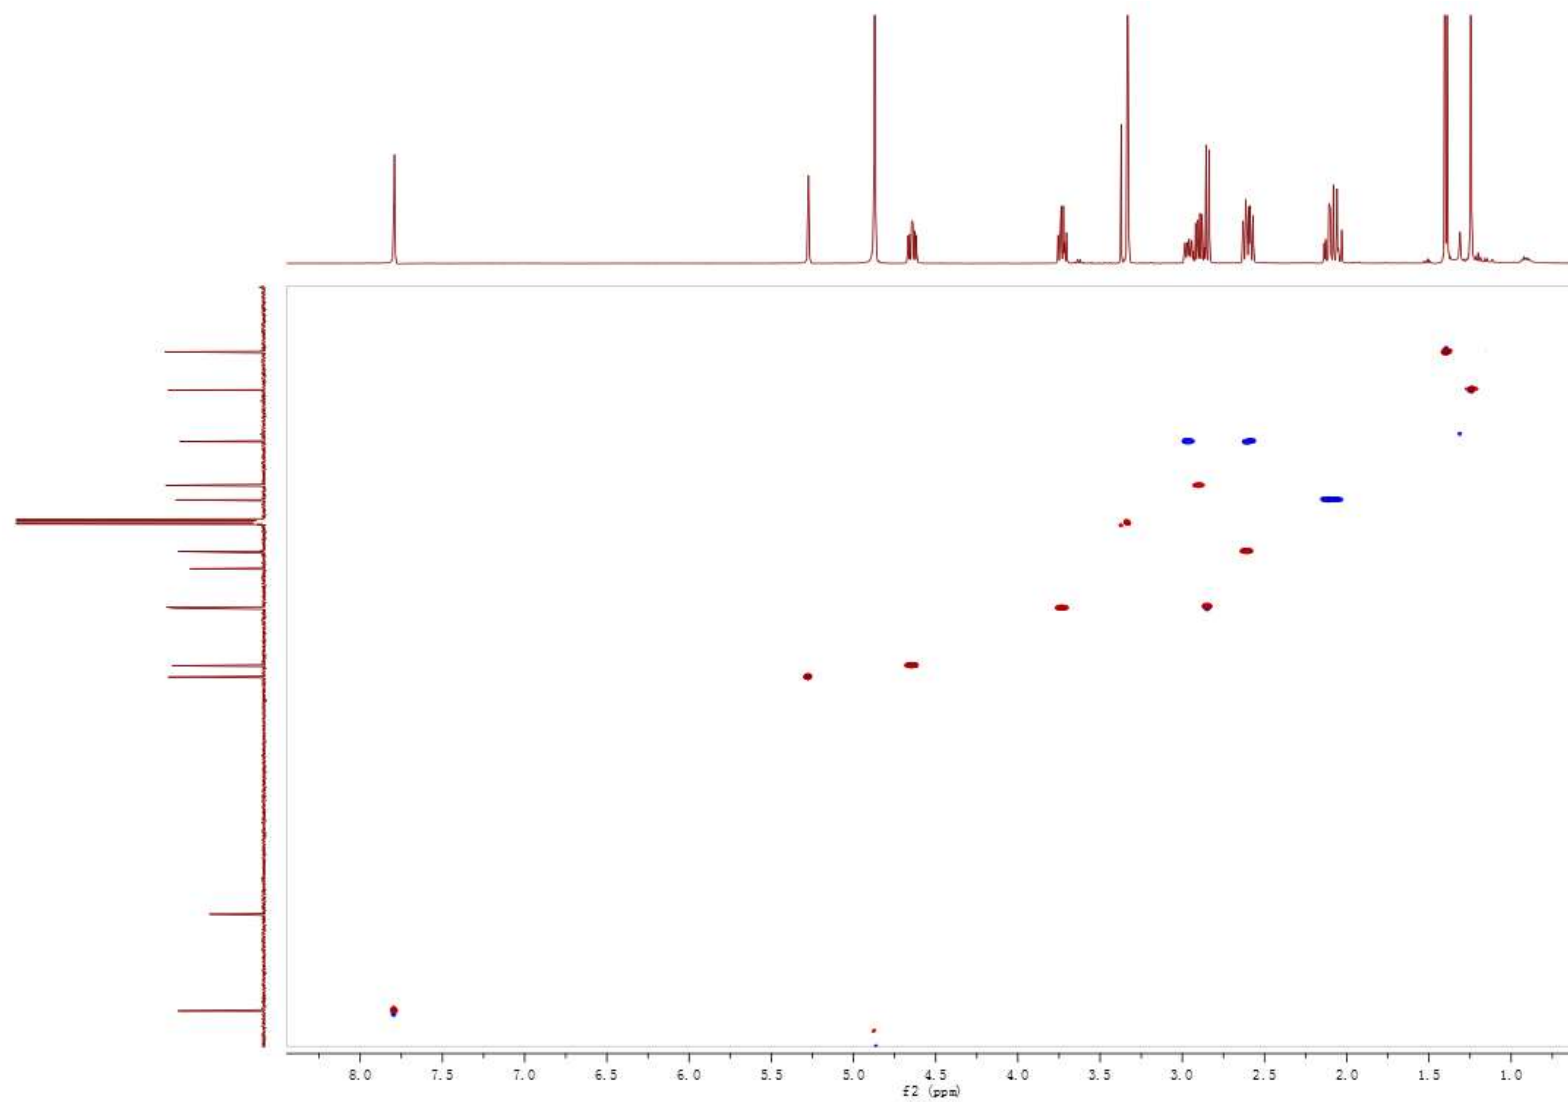

$^1\text{H}$ - $^1\text{H}$  COSY spectrum of compound **1**

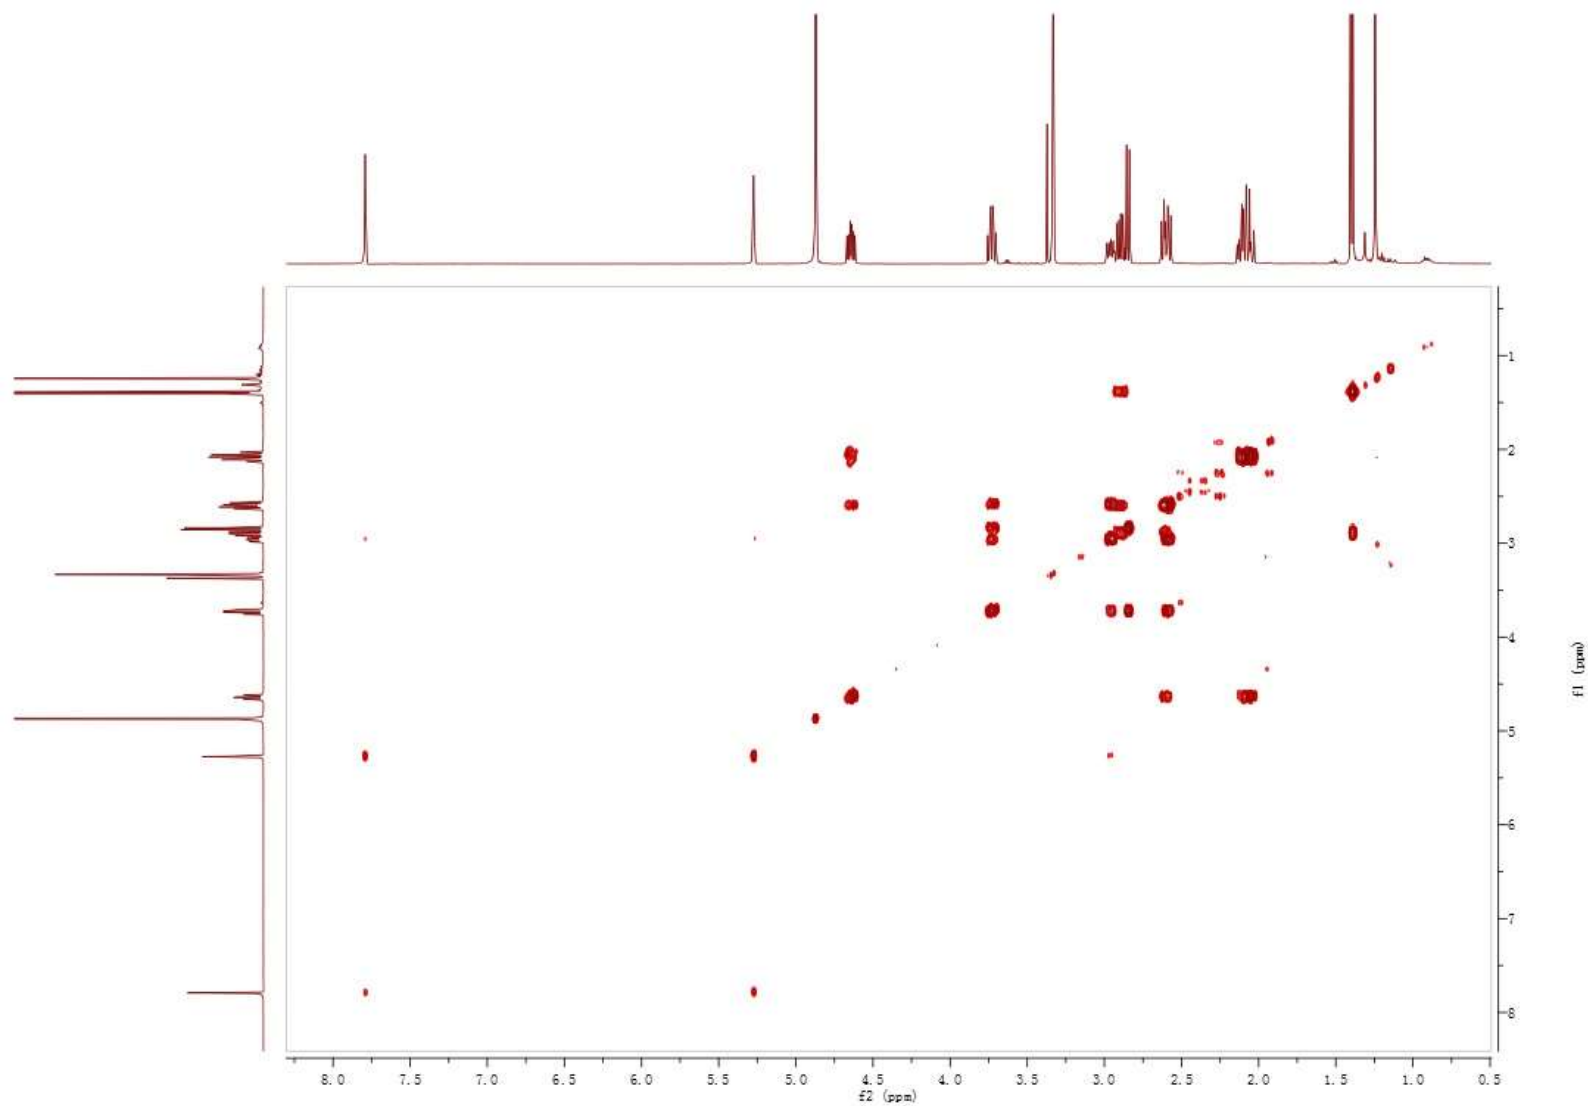

# HMBC spectrum of compound **1**

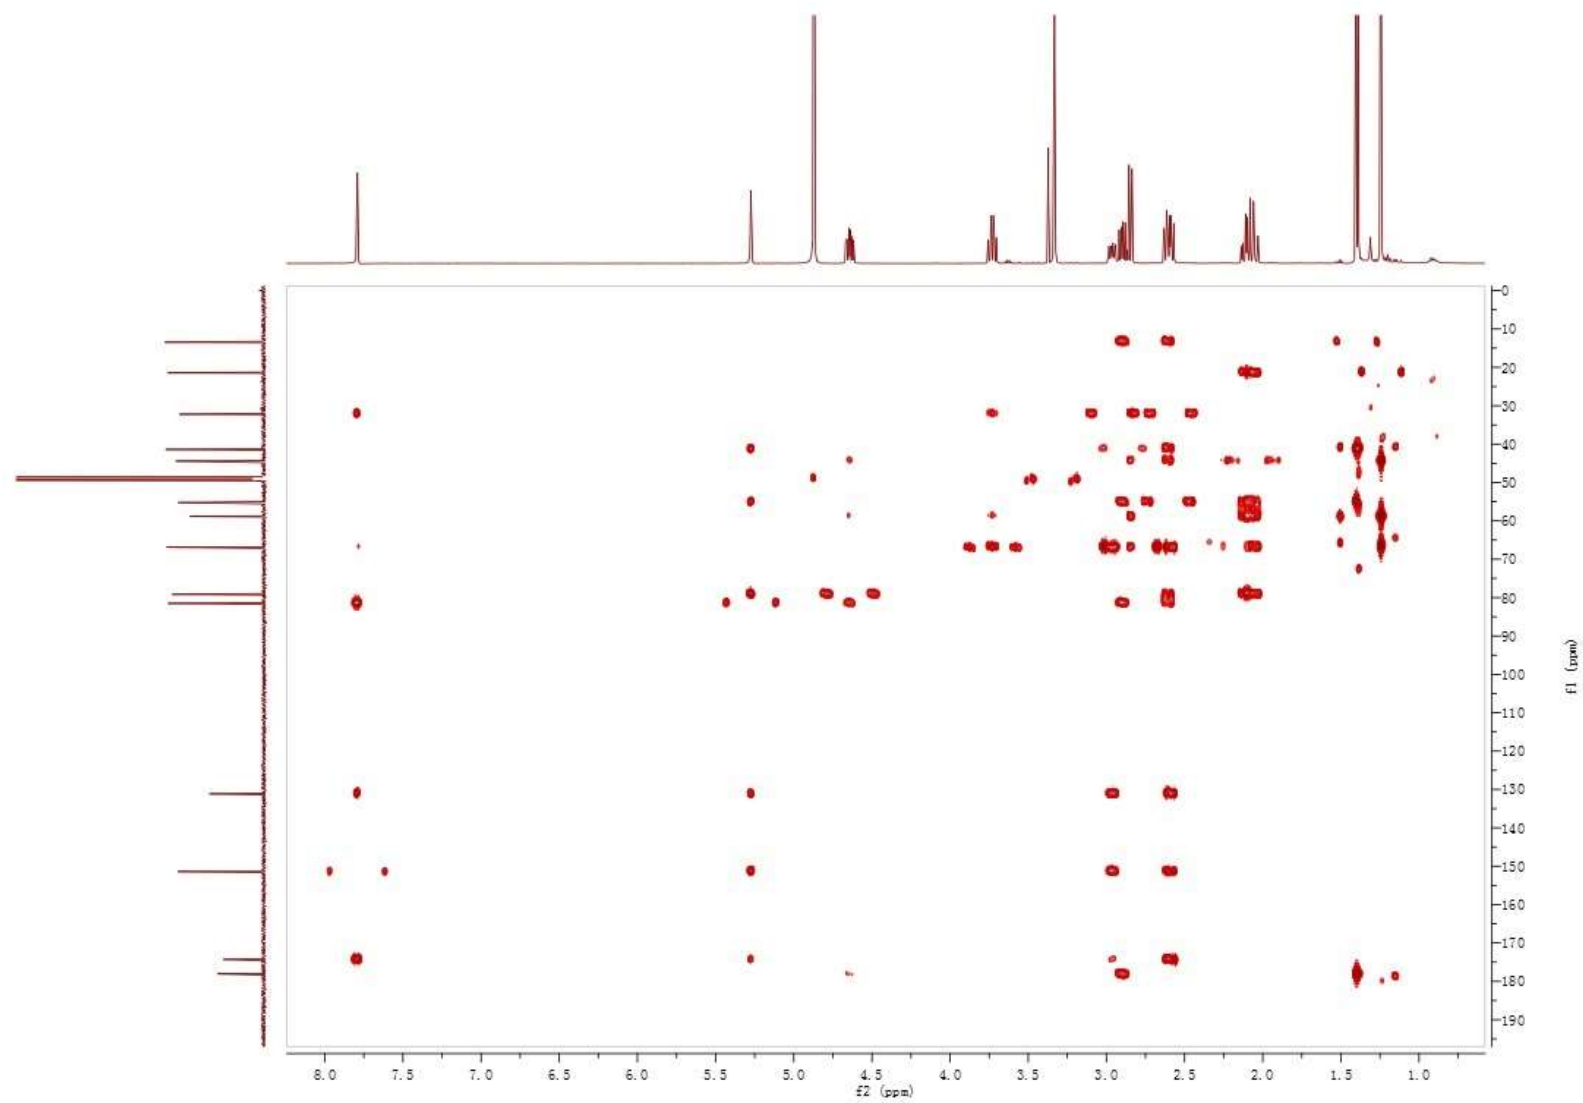

# NOESY spectrum of compound **1**

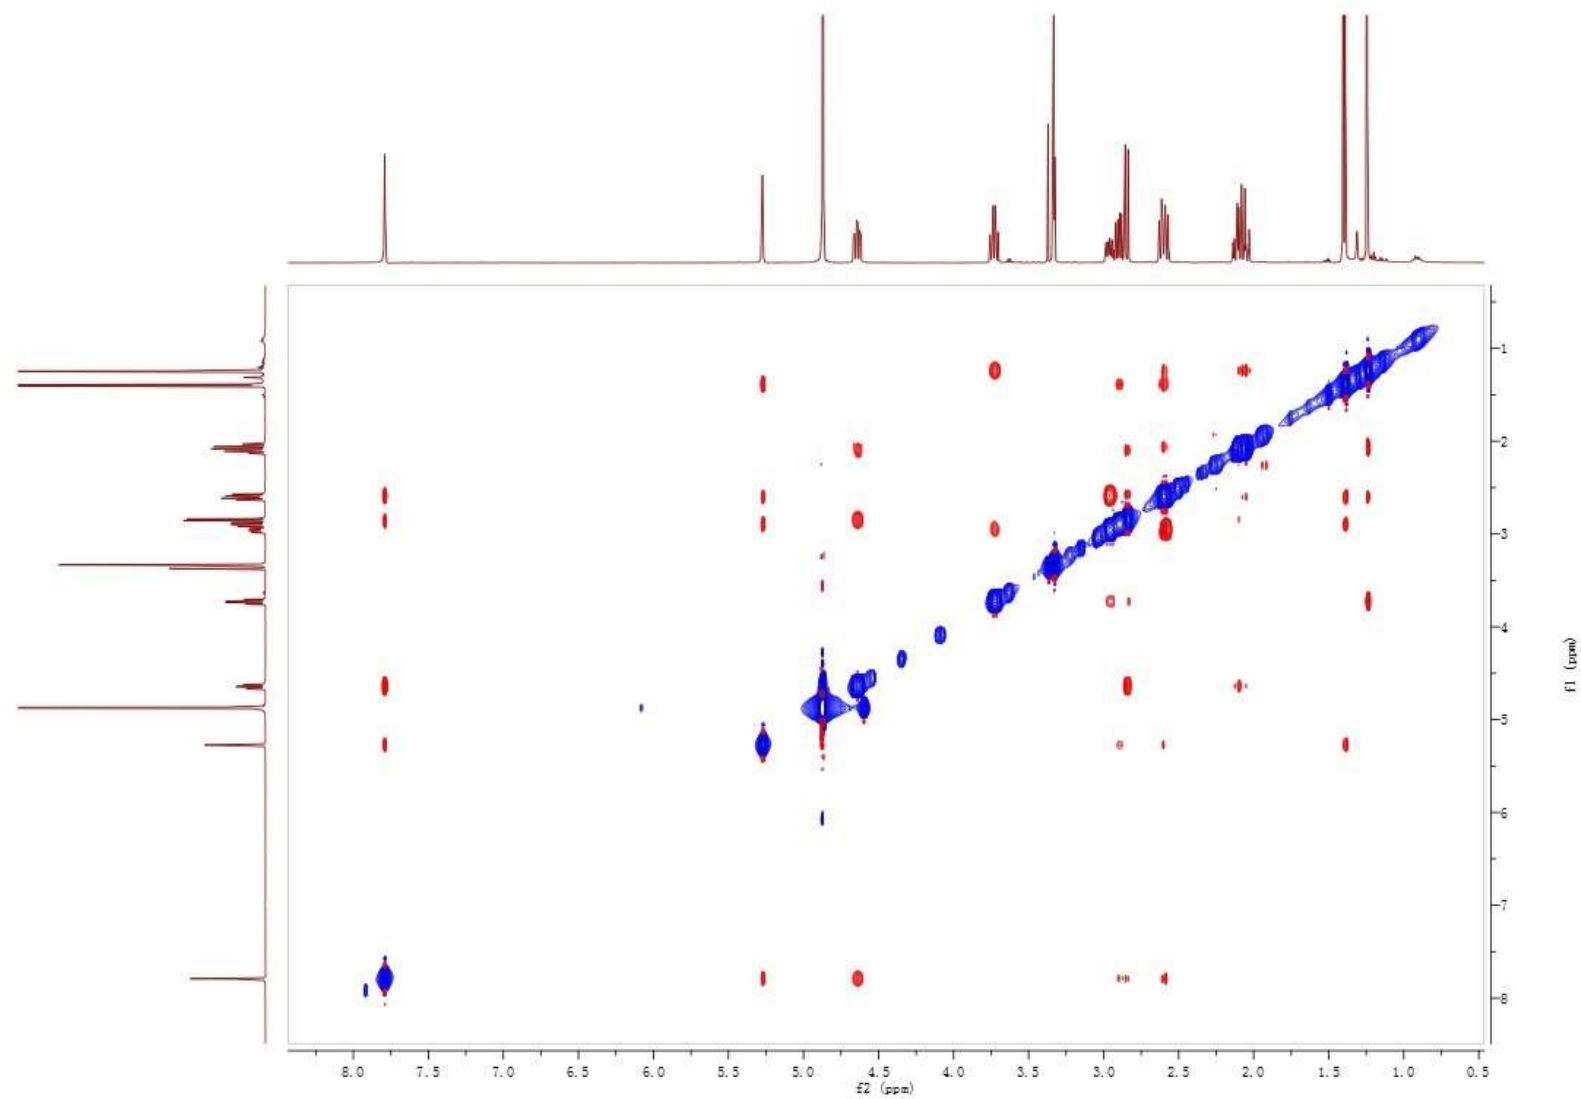



## HR-ESI-MS(-) of compound 2

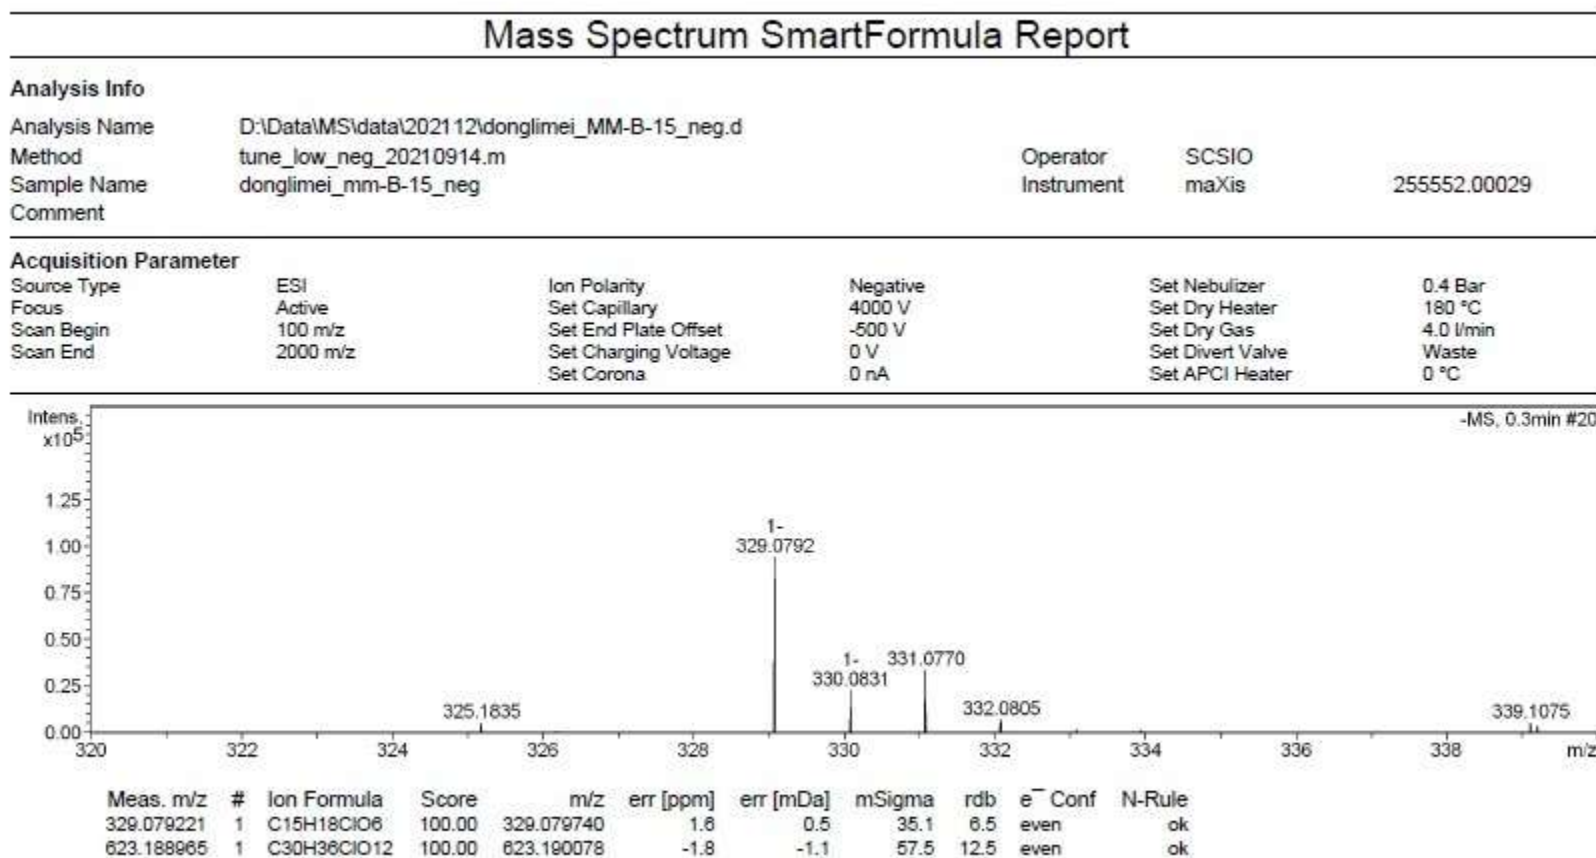

<sup>1</sup>H-NMR spectrum of compound **2**

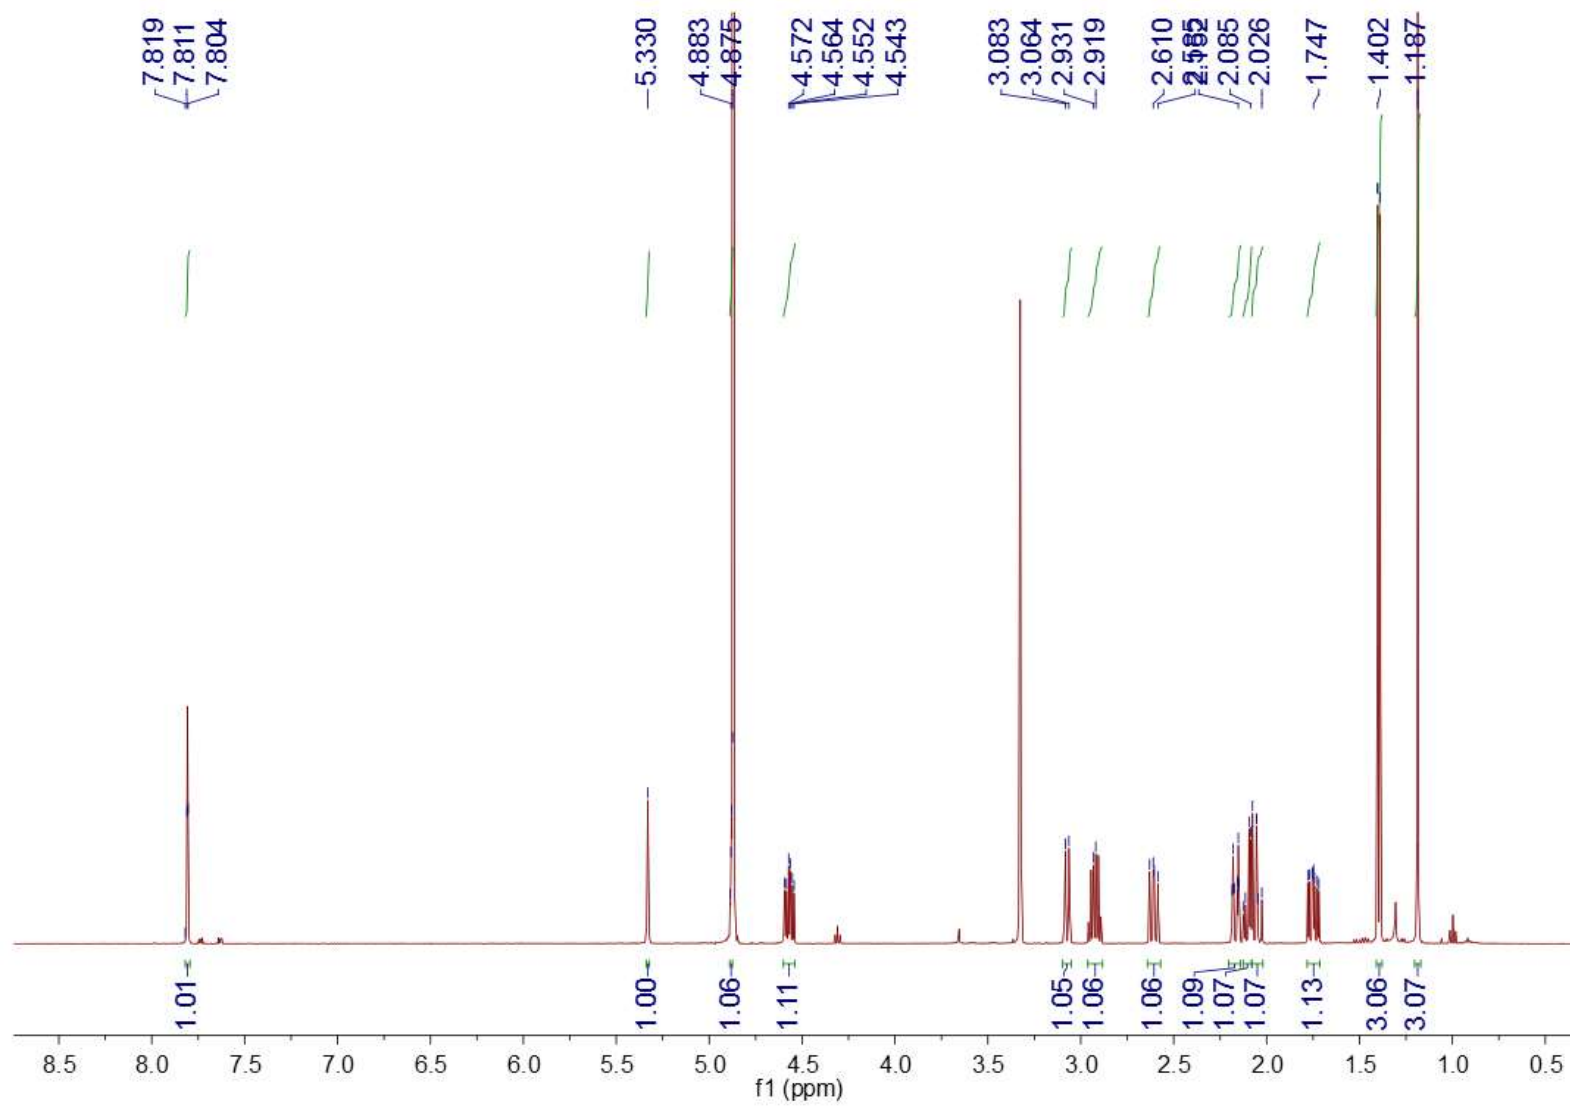

$^{13}\text{C}$ -NMR spectrum of compound **2**

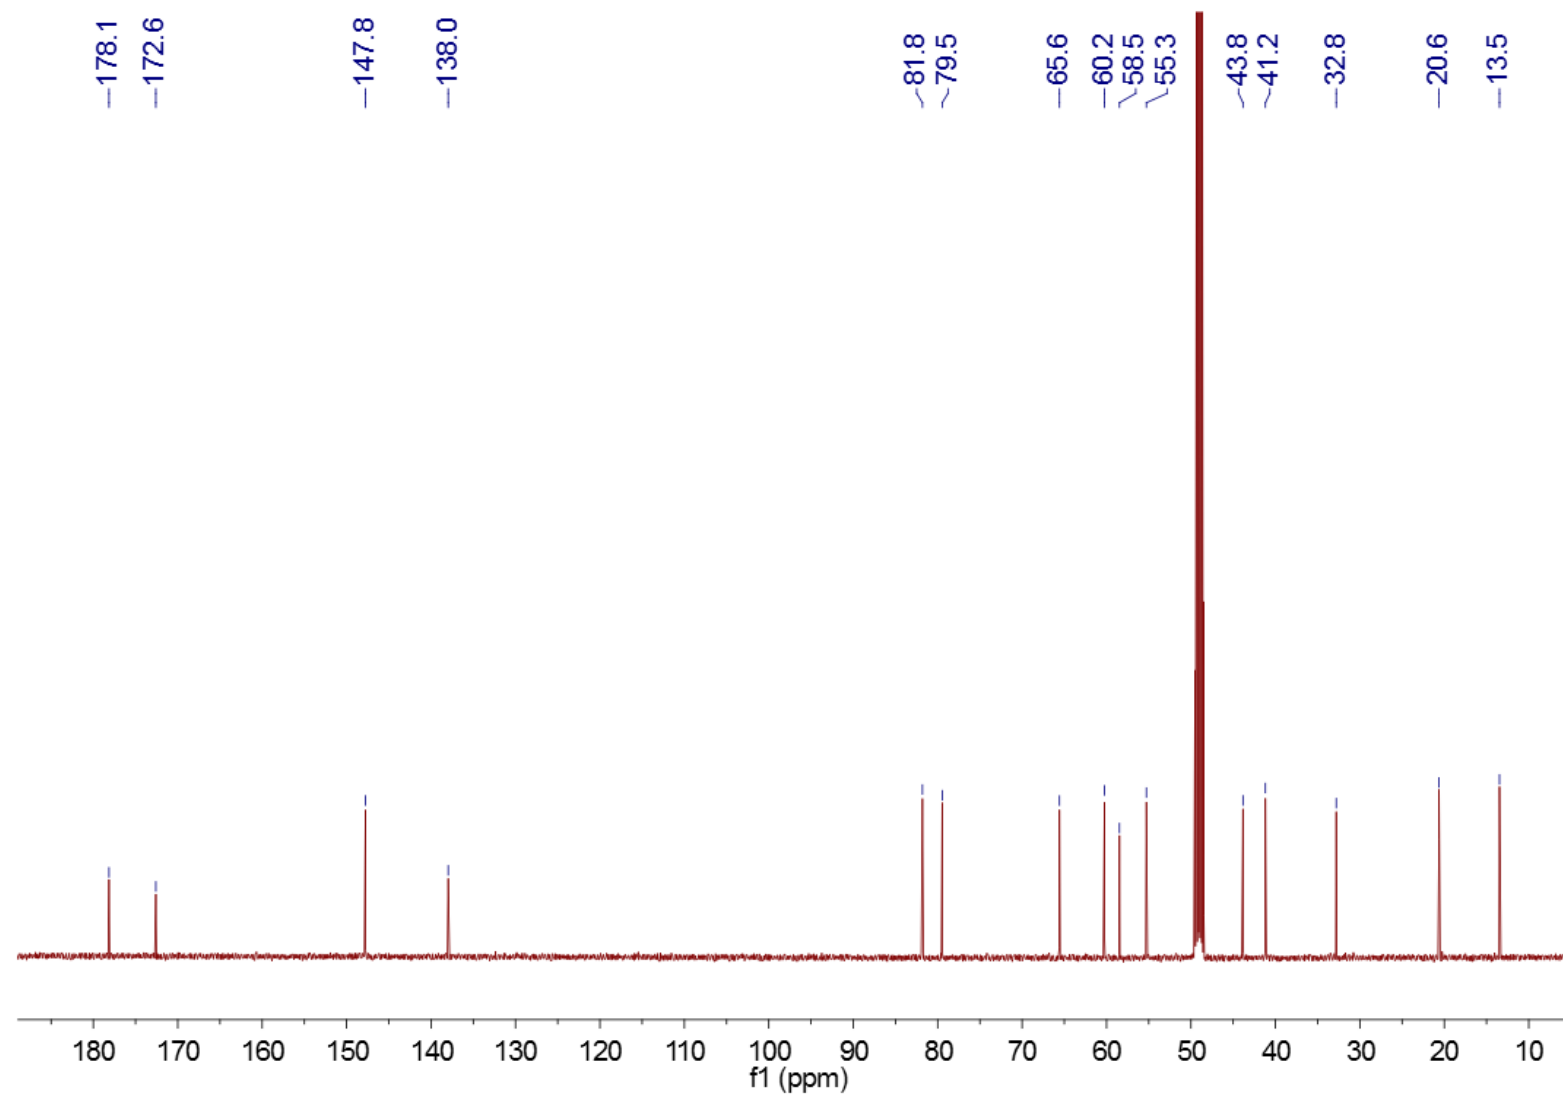

## HSQC spectrum of compound 2

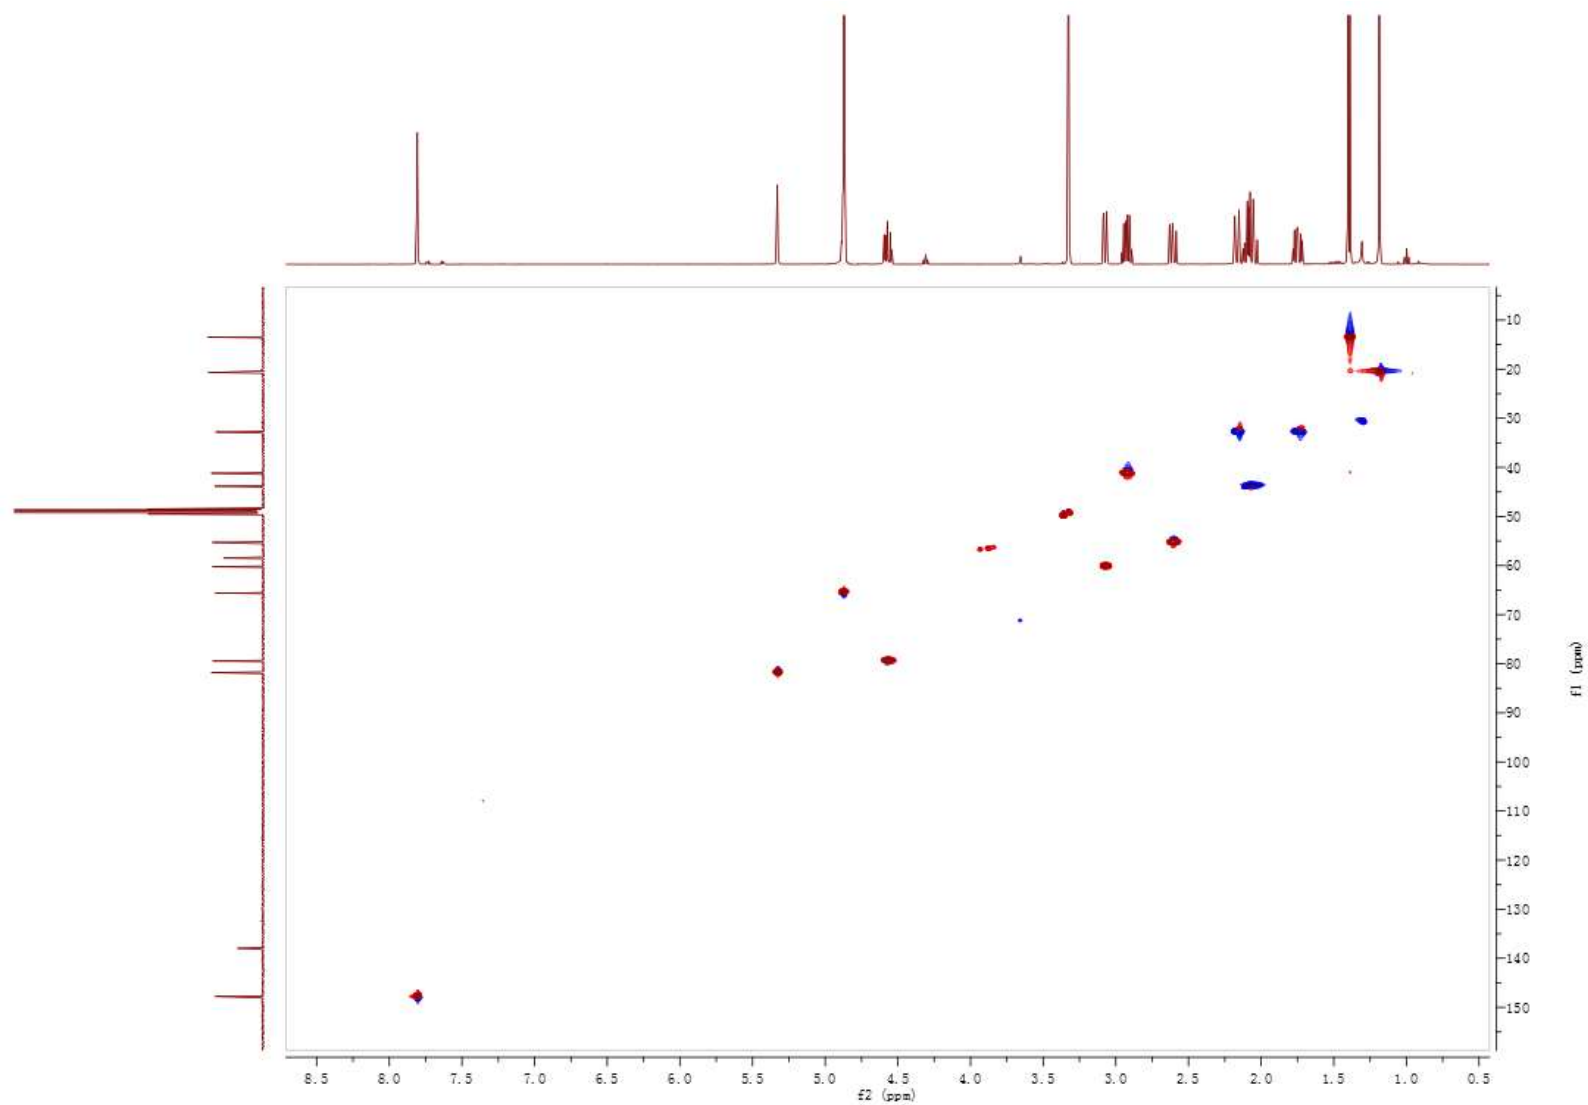

$^1\text{H}$ - $^1\text{H}$  COSY spectrum of compound **2**

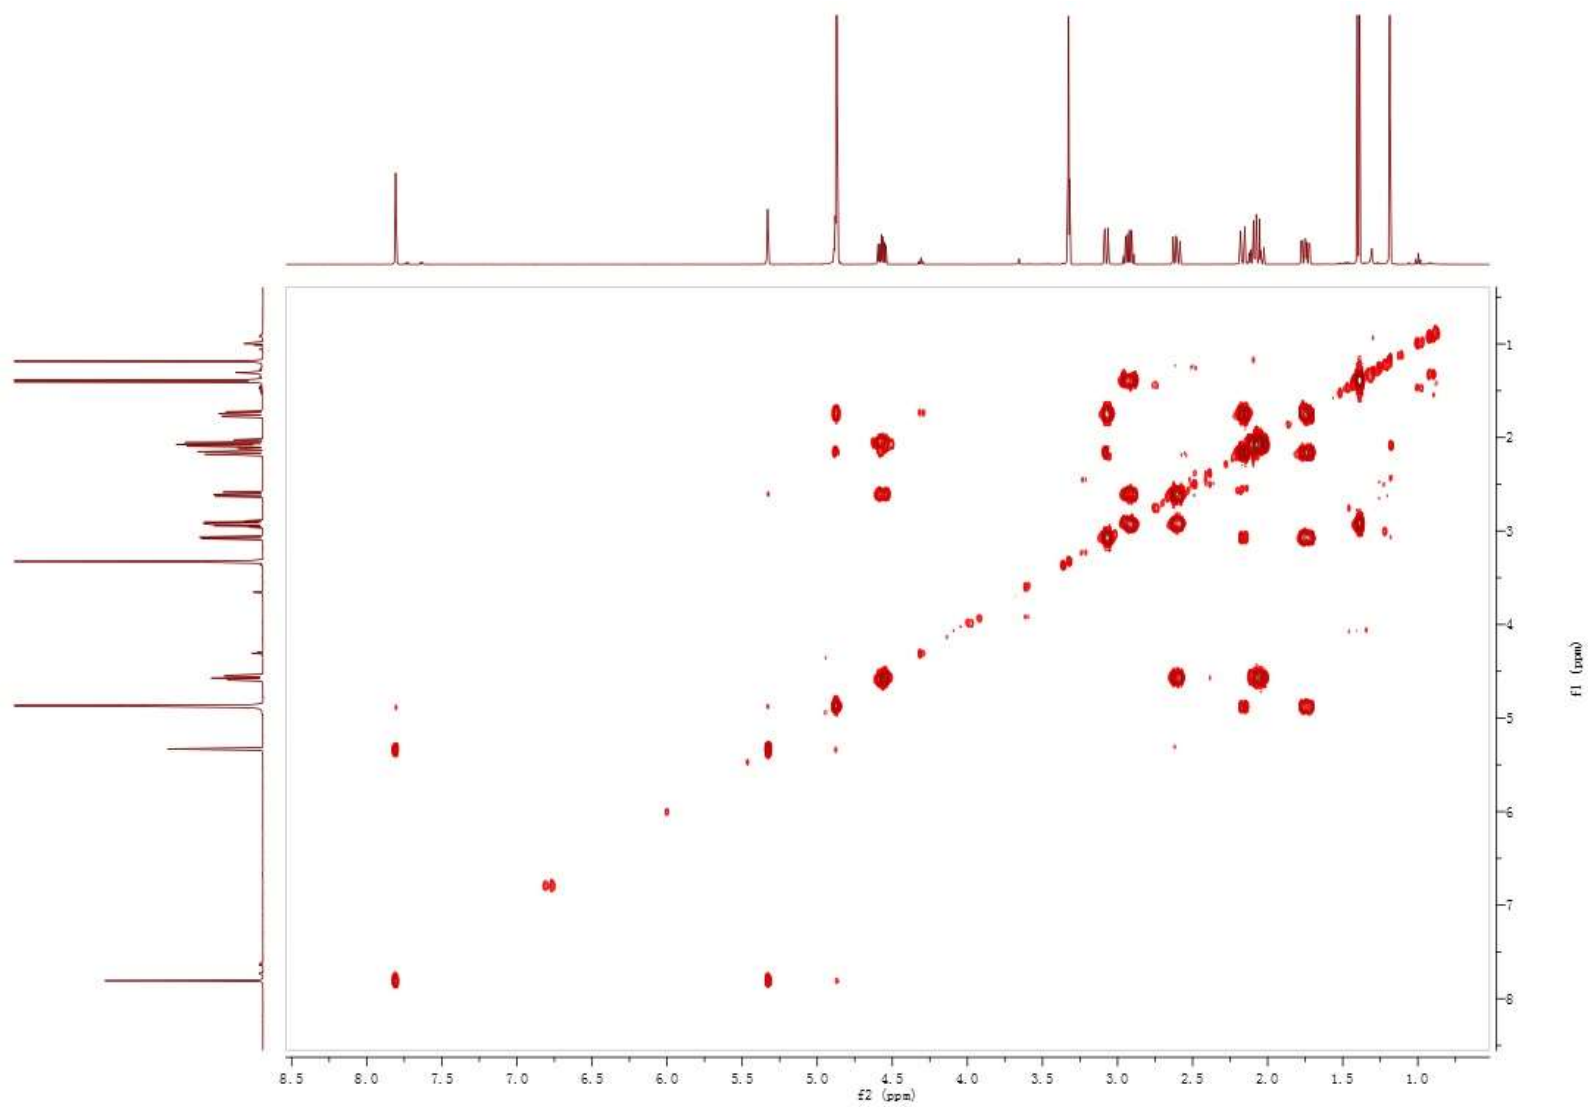

## HMBC spectrum of compound **2**

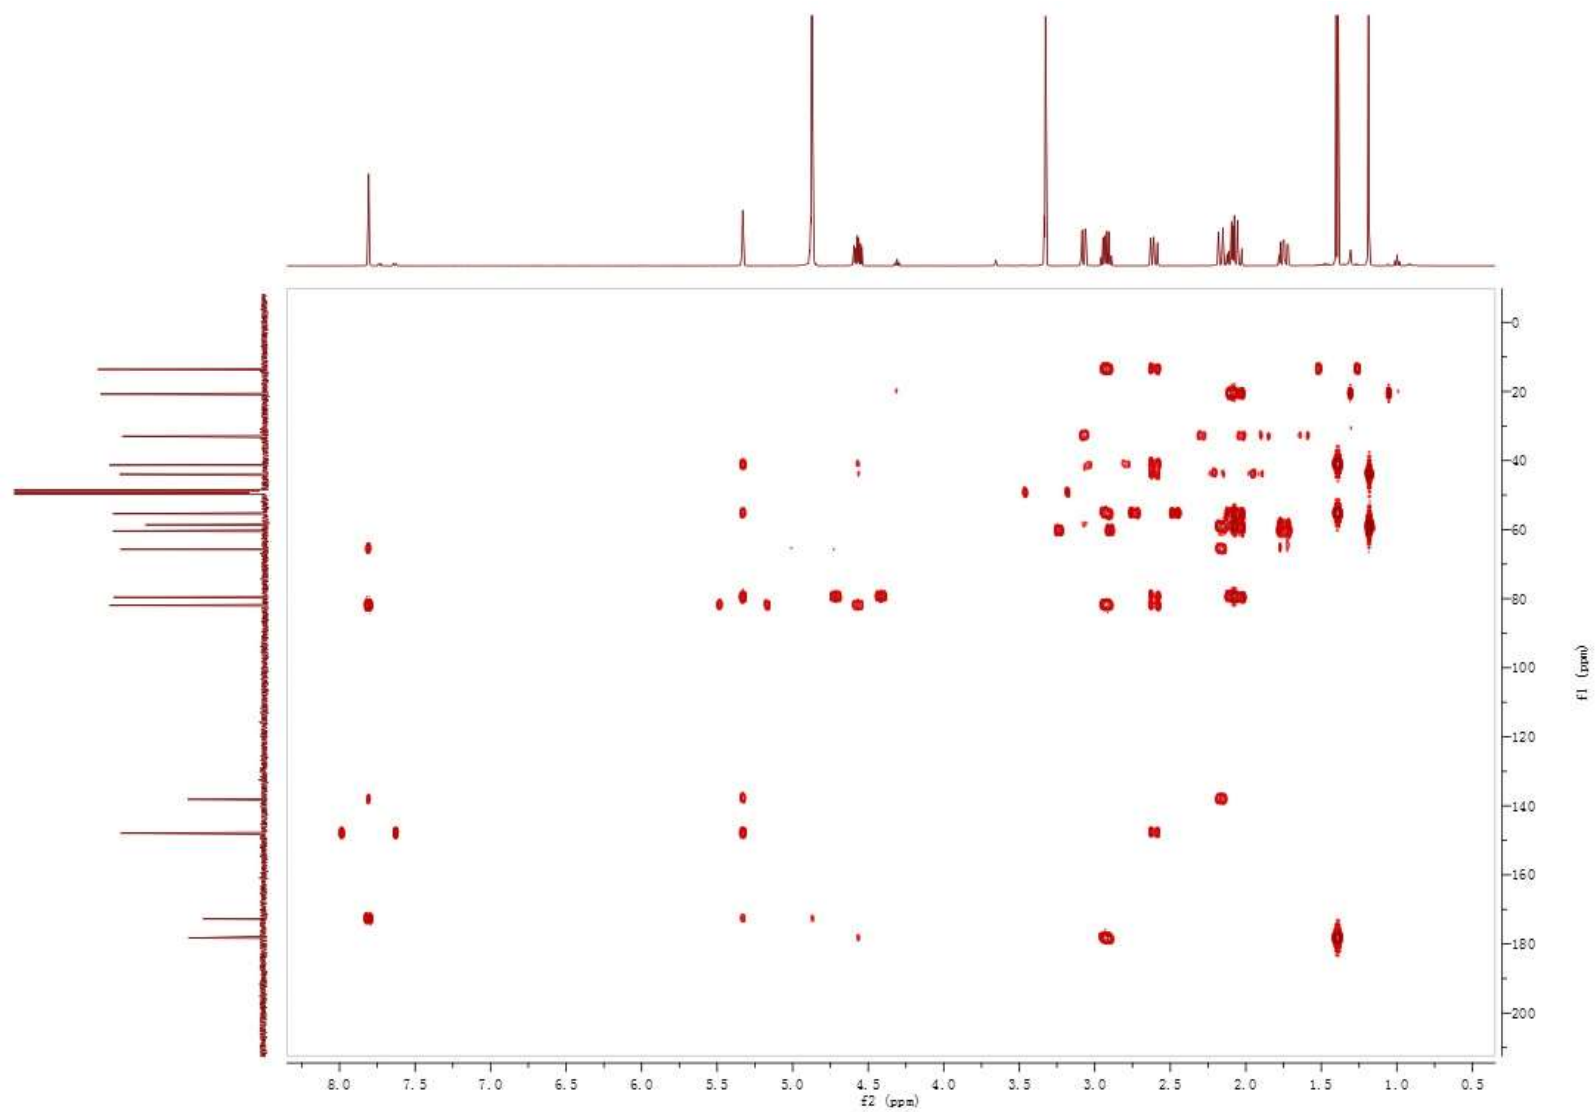

## NOESY spectrum of compound 2

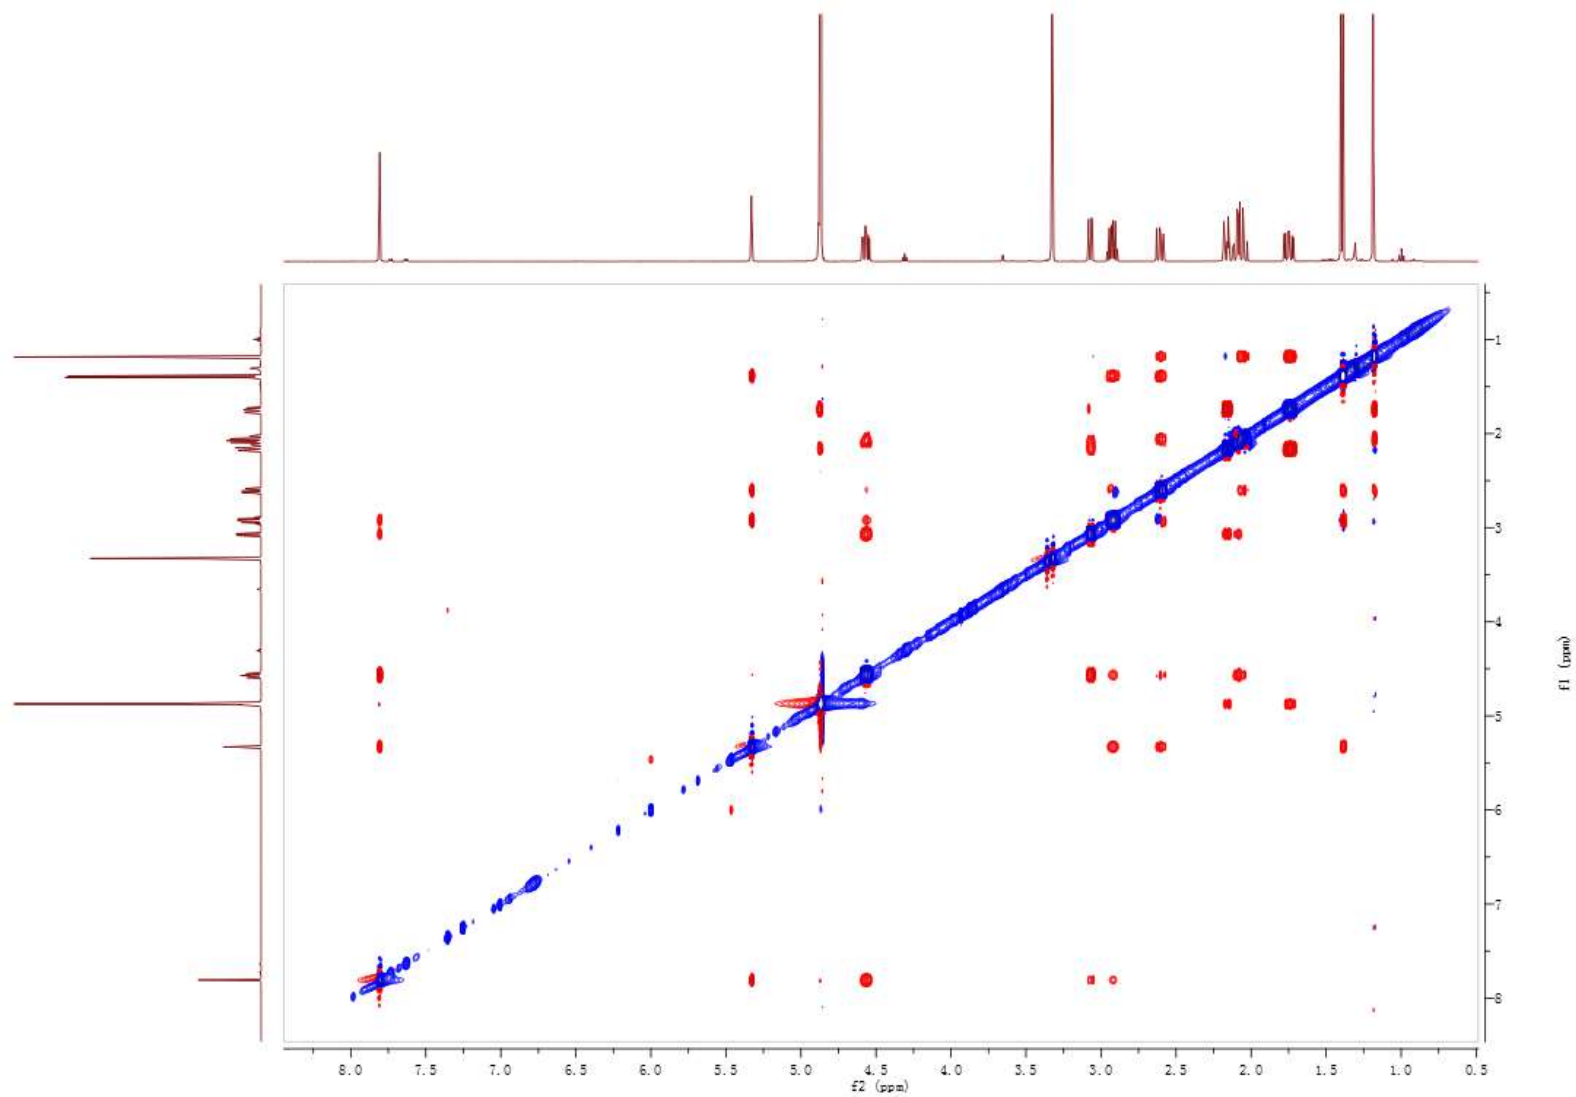

# HR-ESI-MS(+) of compound 3

## Mass Spectrum SmartFormula Report

### Analysis Info

|               |                                                            |                   |          |
|---------------|------------------------------------------------------------|-------------------|----------|
| Analysis Name | D:\Data\MS\data\202101\donglimei_E8-5-3-3_neg_24_01_1342.d |                   |          |
| Method        | LC_Direct Infusion_neg_100-1000mz.m                        | Operator          | SCSIO    |
| Sample Name   | donglimei_E8-5-3-3_neg                                     | Instrument / Ser# | maXis 29 |
| Comment       |                                                            |                   |          |

### Acquisition Parameter

|             |          |                       |           |                  |           |
|-------------|----------|-----------------------|-----------|------------------|-----------|
| Source Type | ESI      | Ion Polarity          | Negative  | Set Nebulizer    | 0.4 Bar   |
| Focus       | Active   | Set Capillary         | 3800 V    | Set Dry Heater   | 180 °C    |
| Scan Begin  | 100 m/z  | Set End Plate Offset  | -500 V    | Set Dry Gas      | 4.0 l/min |
| Scan End    | 2000 m/z | Set Collision Cell RF | 550.0 Vpp | Set Divert Valve | Waste     |

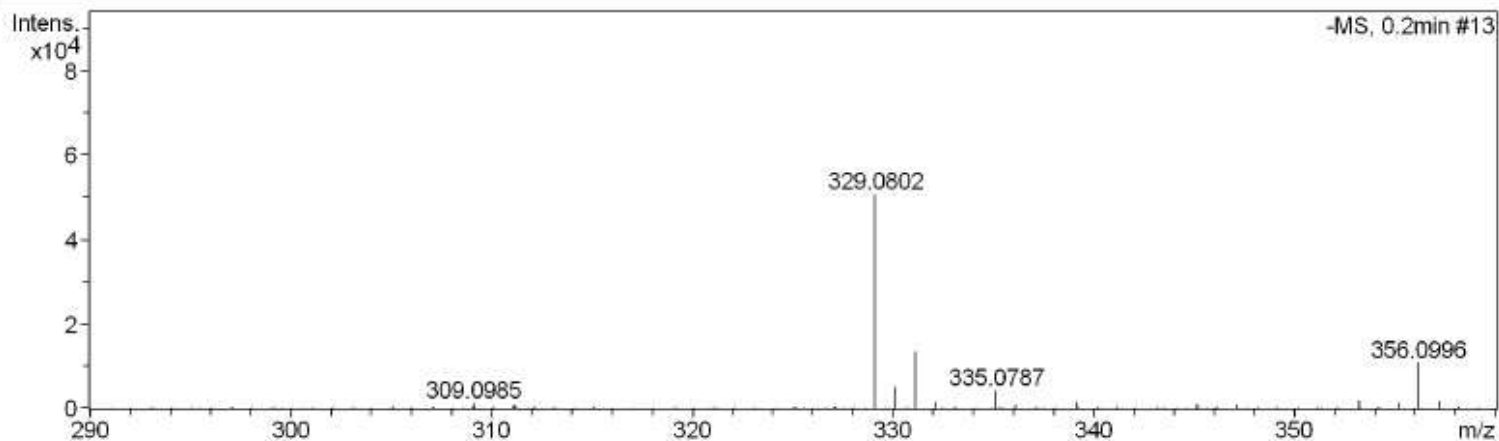

| Meas. m/z | # | Formula           | Score  | m/z      | err [ppm] | err [mDa] | mSigma | rdb  | e <sup>-</sup> Conf | N-Rule |
|-----------|---|-------------------|--------|----------|-----------|-----------|--------|------|---------------------|--------|
| 293.1036  | 1 | C 15 H 17 O 6     | 100.00 | 293.1031 | -1.8      | -0.5      | 77.0   | 7.5  | even                | ok     |
| 329.0802  | 1 | C 15 H 18 Cl O 6  | 100.00 | 329.0797 | -1.5      | -0.5      | 46.0   | 6.5  | even                | ok     |
| 623.1912  | 1 | C 30 H 36 Cl O 12 | 100.00 | 623.1901 | -1.9      | -1.2      | 47.5   | 12.5 | even                | ok     |



<sup>1</sup>H-NMR spectrum of compound **3**

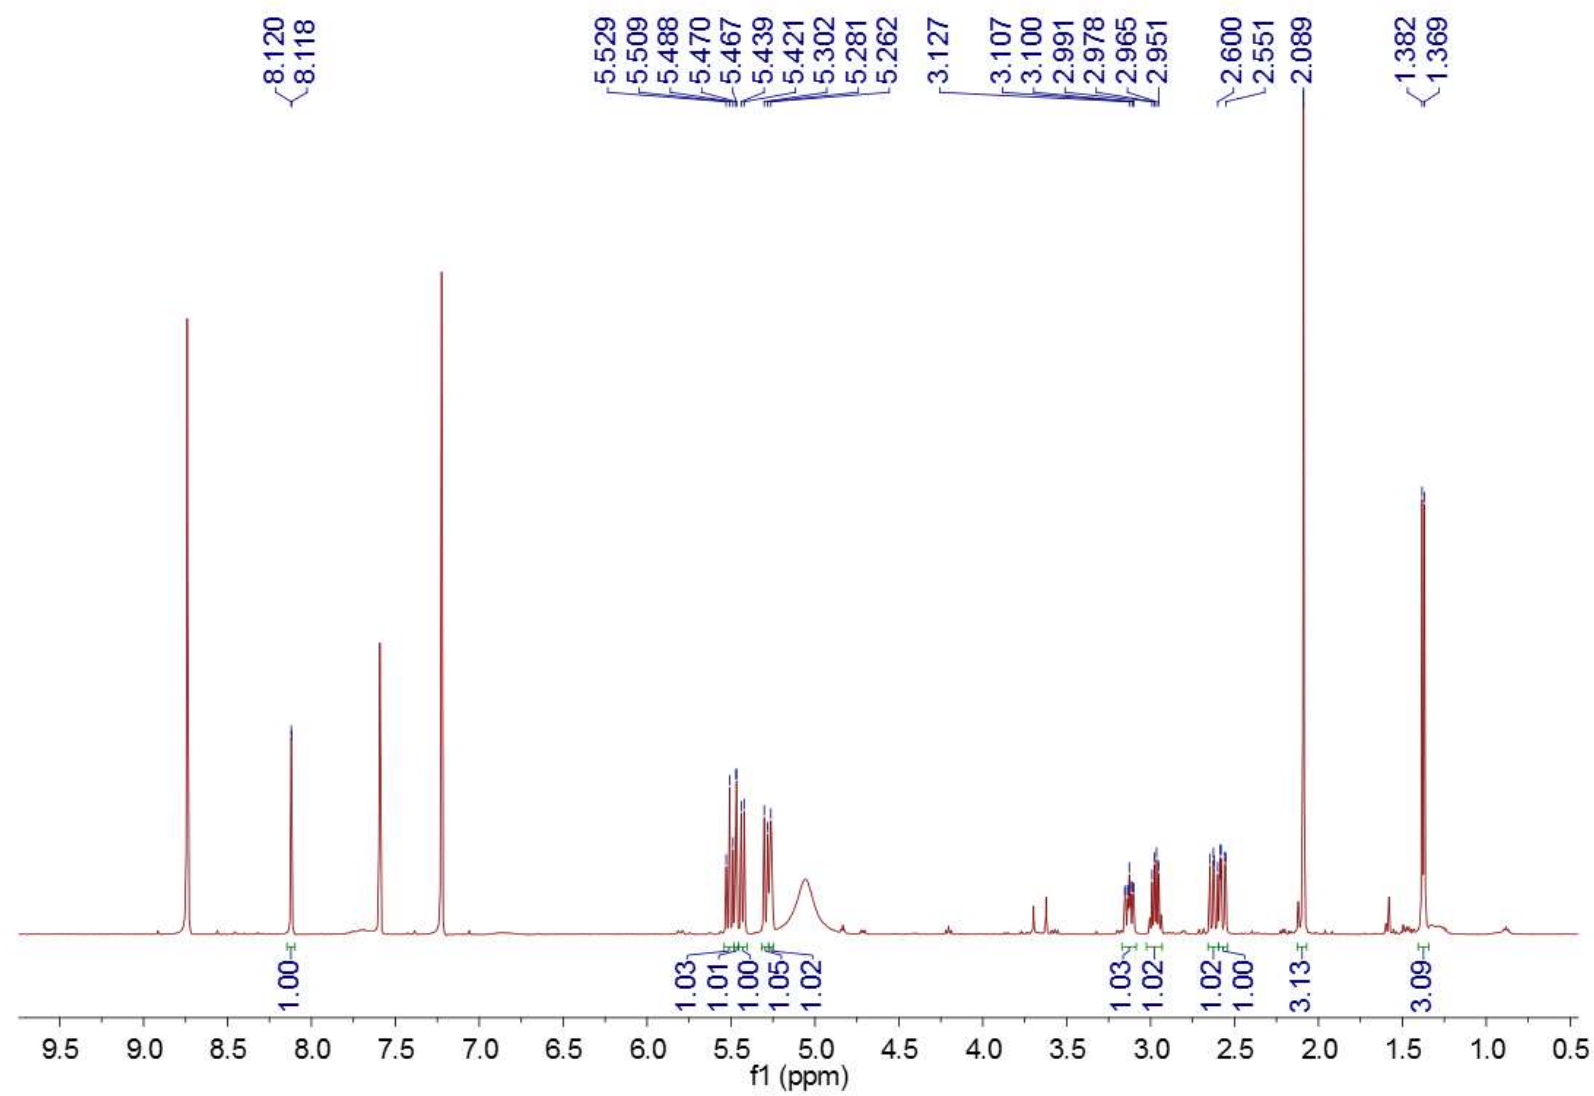

<sup>13</sup>C-NMR spectrum of compound **3**

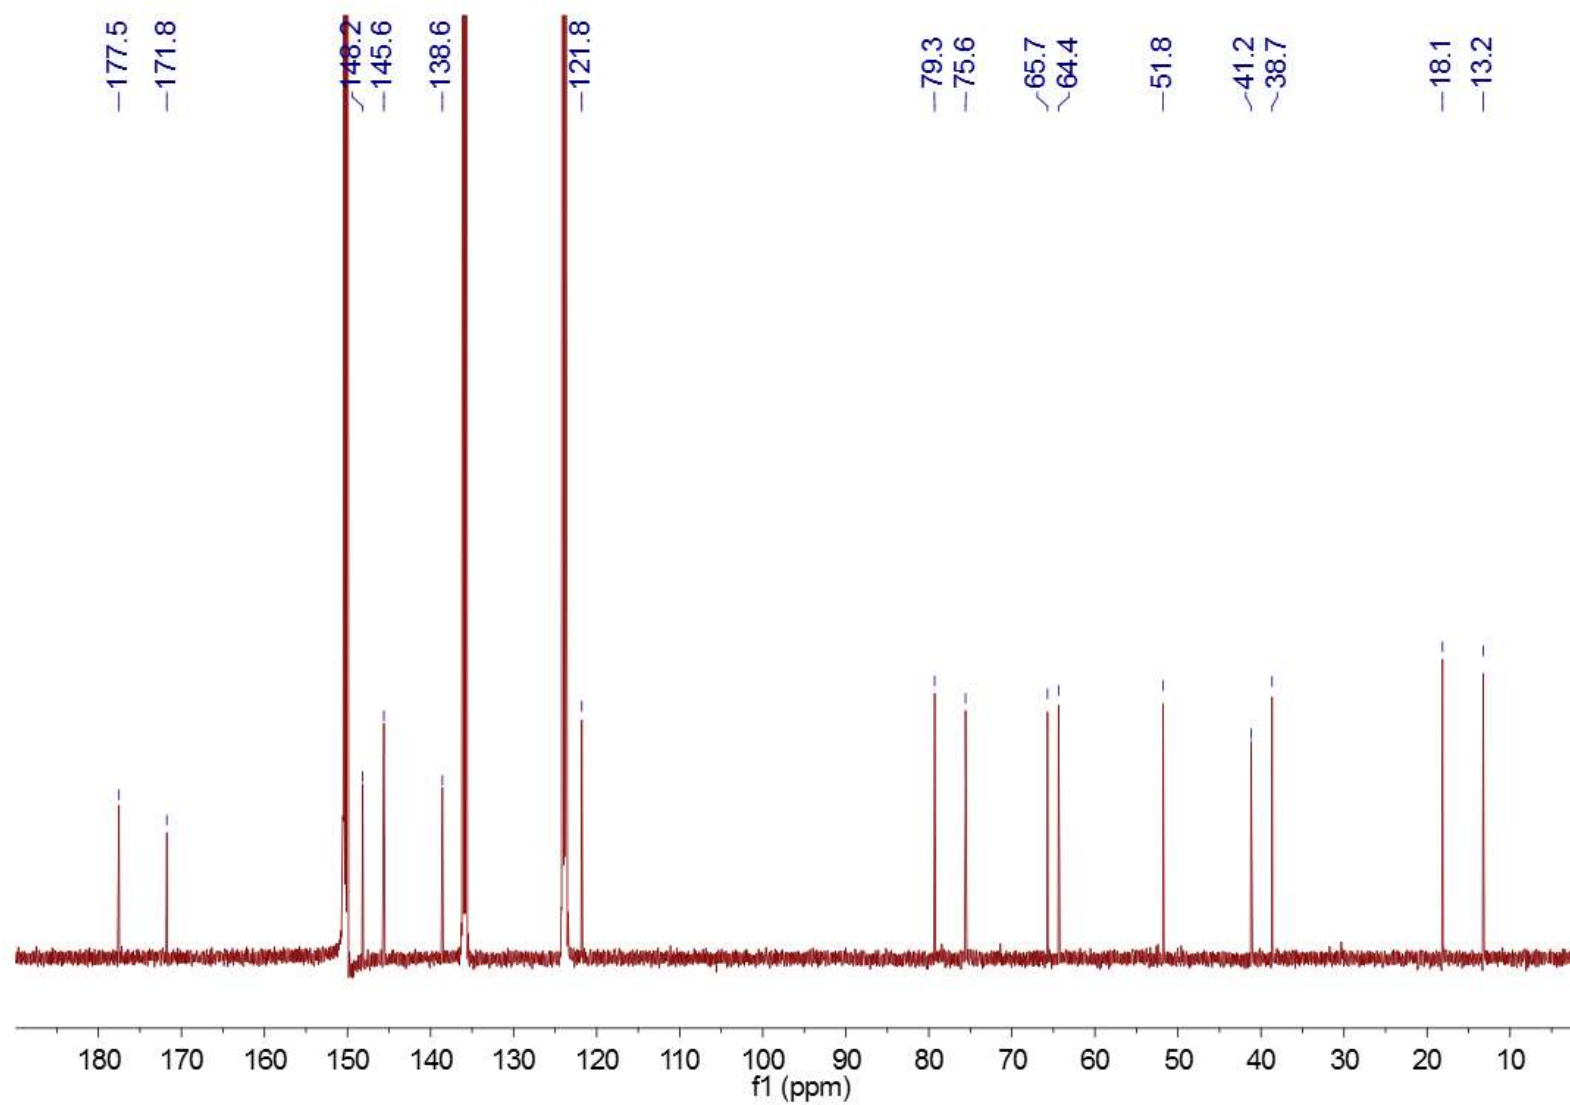

## HSQC spectrum of compound 3

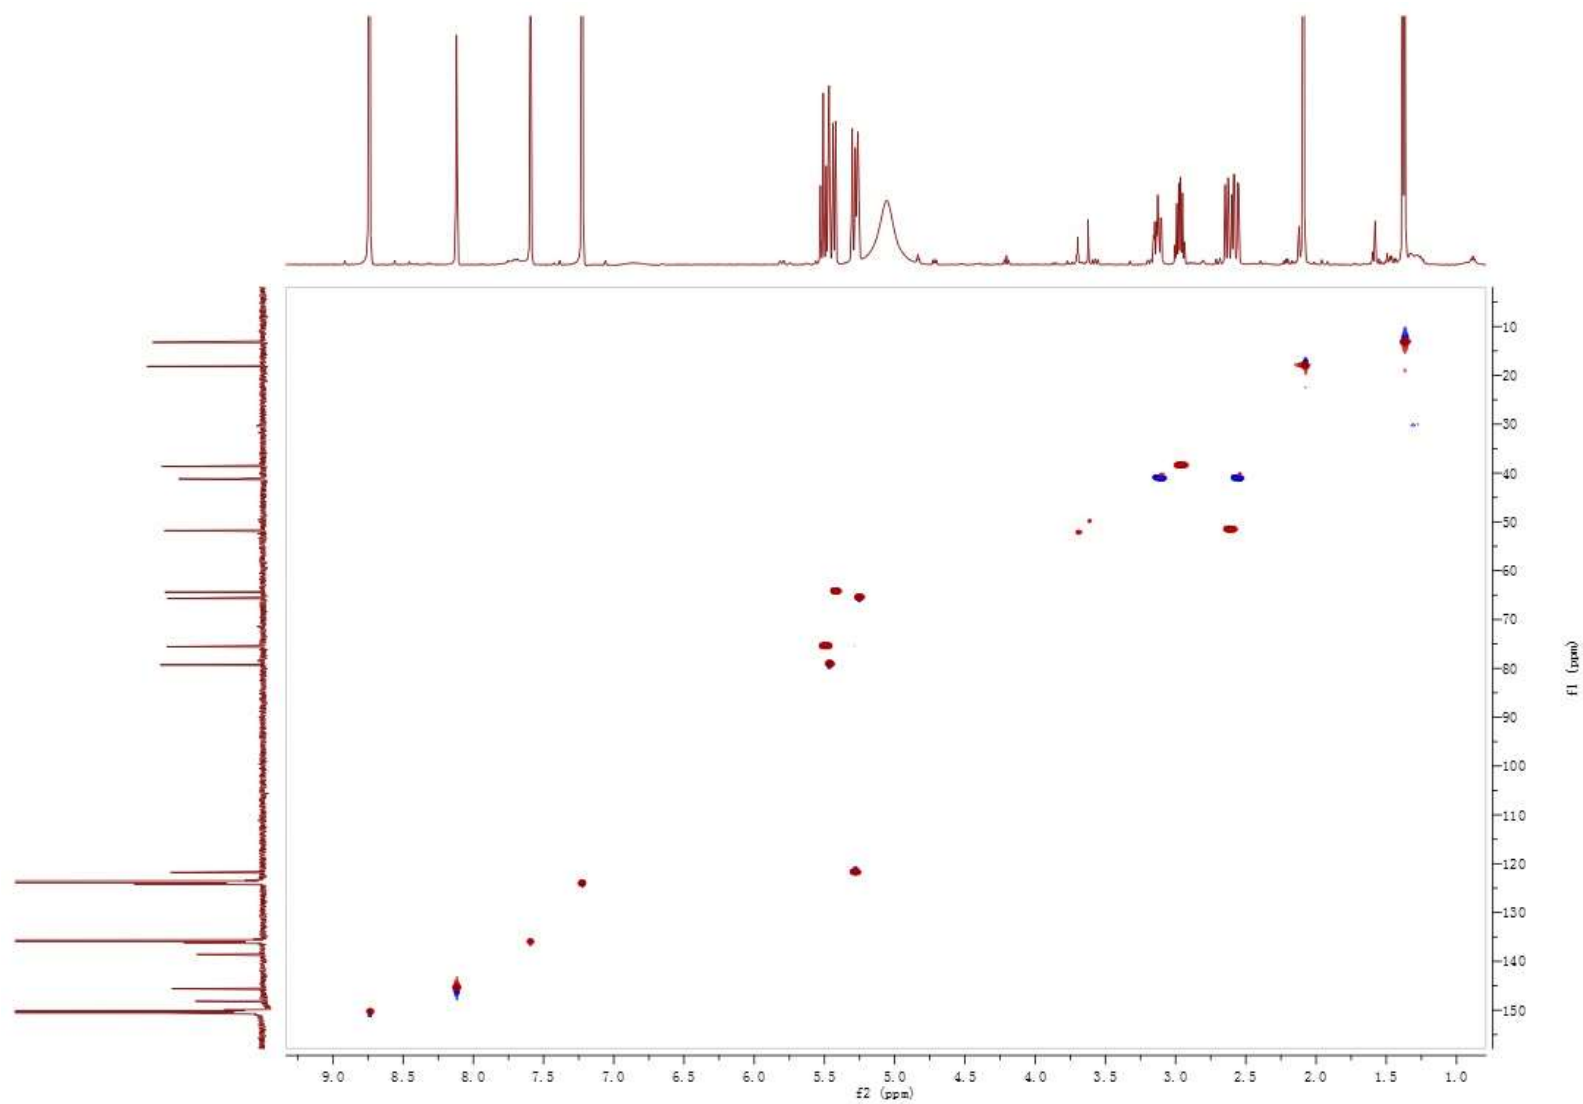

$^1\text{H}$ - $^1\text{H}$  COSY spectrum of compound **3**

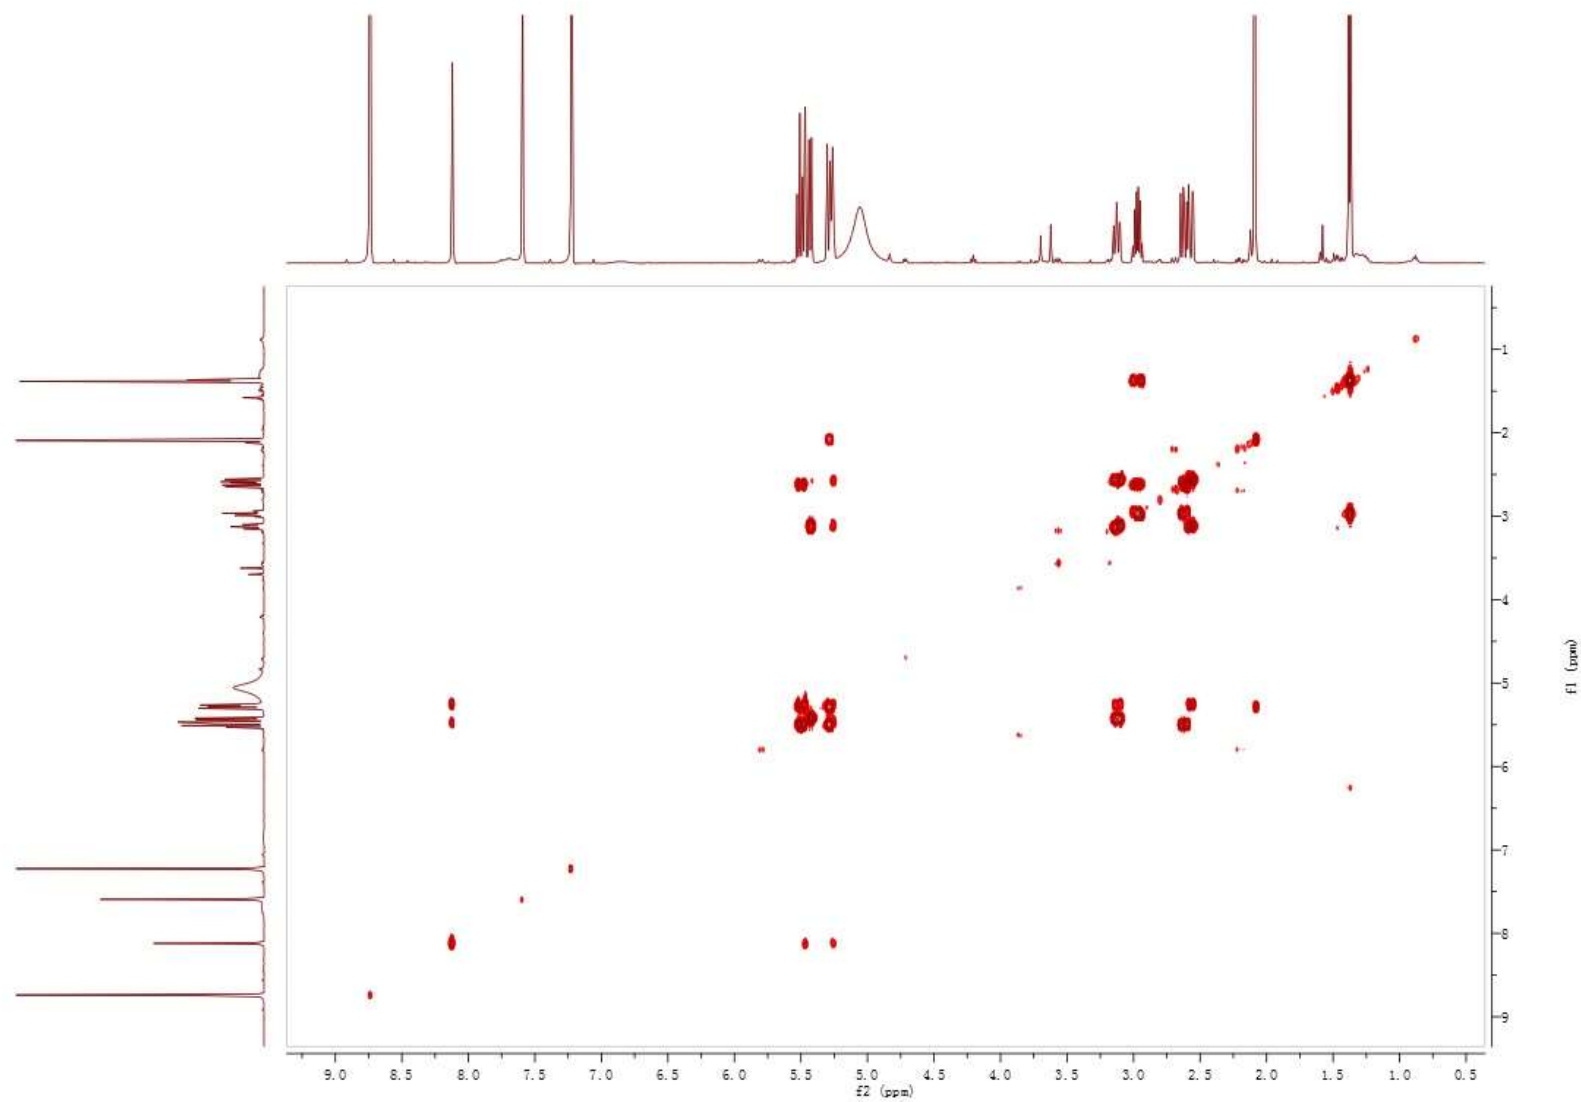

# HMBC spectrum of compound 3

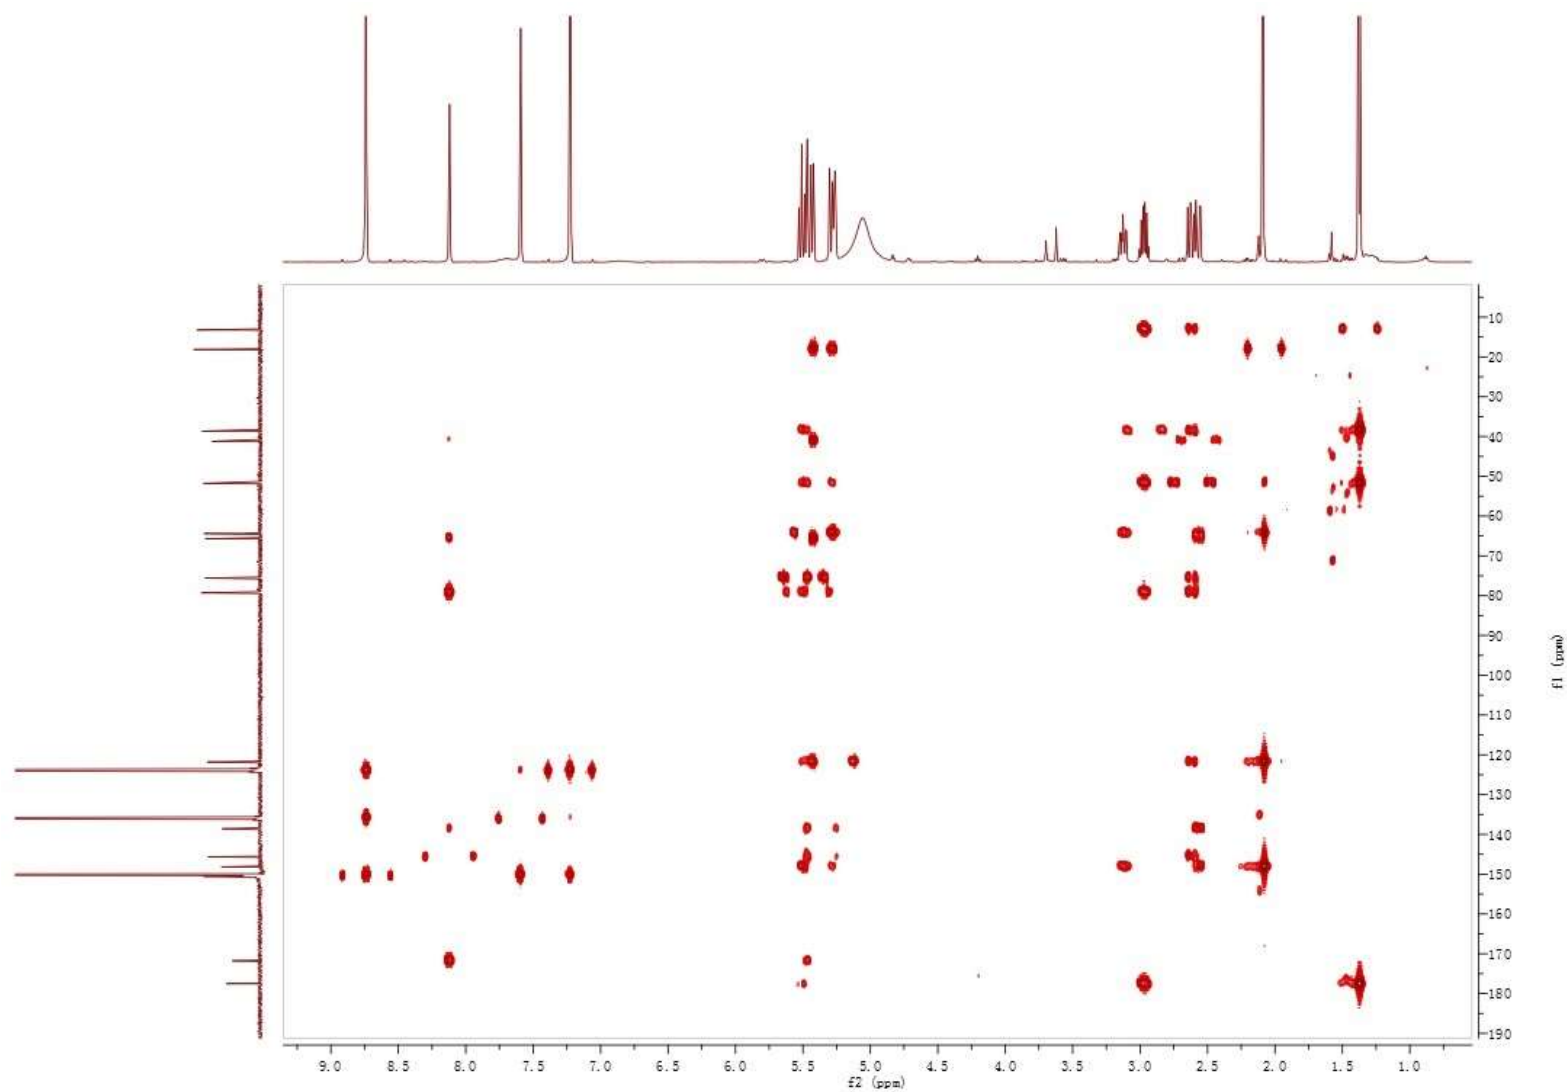

## NOESY spectrum of compound 3

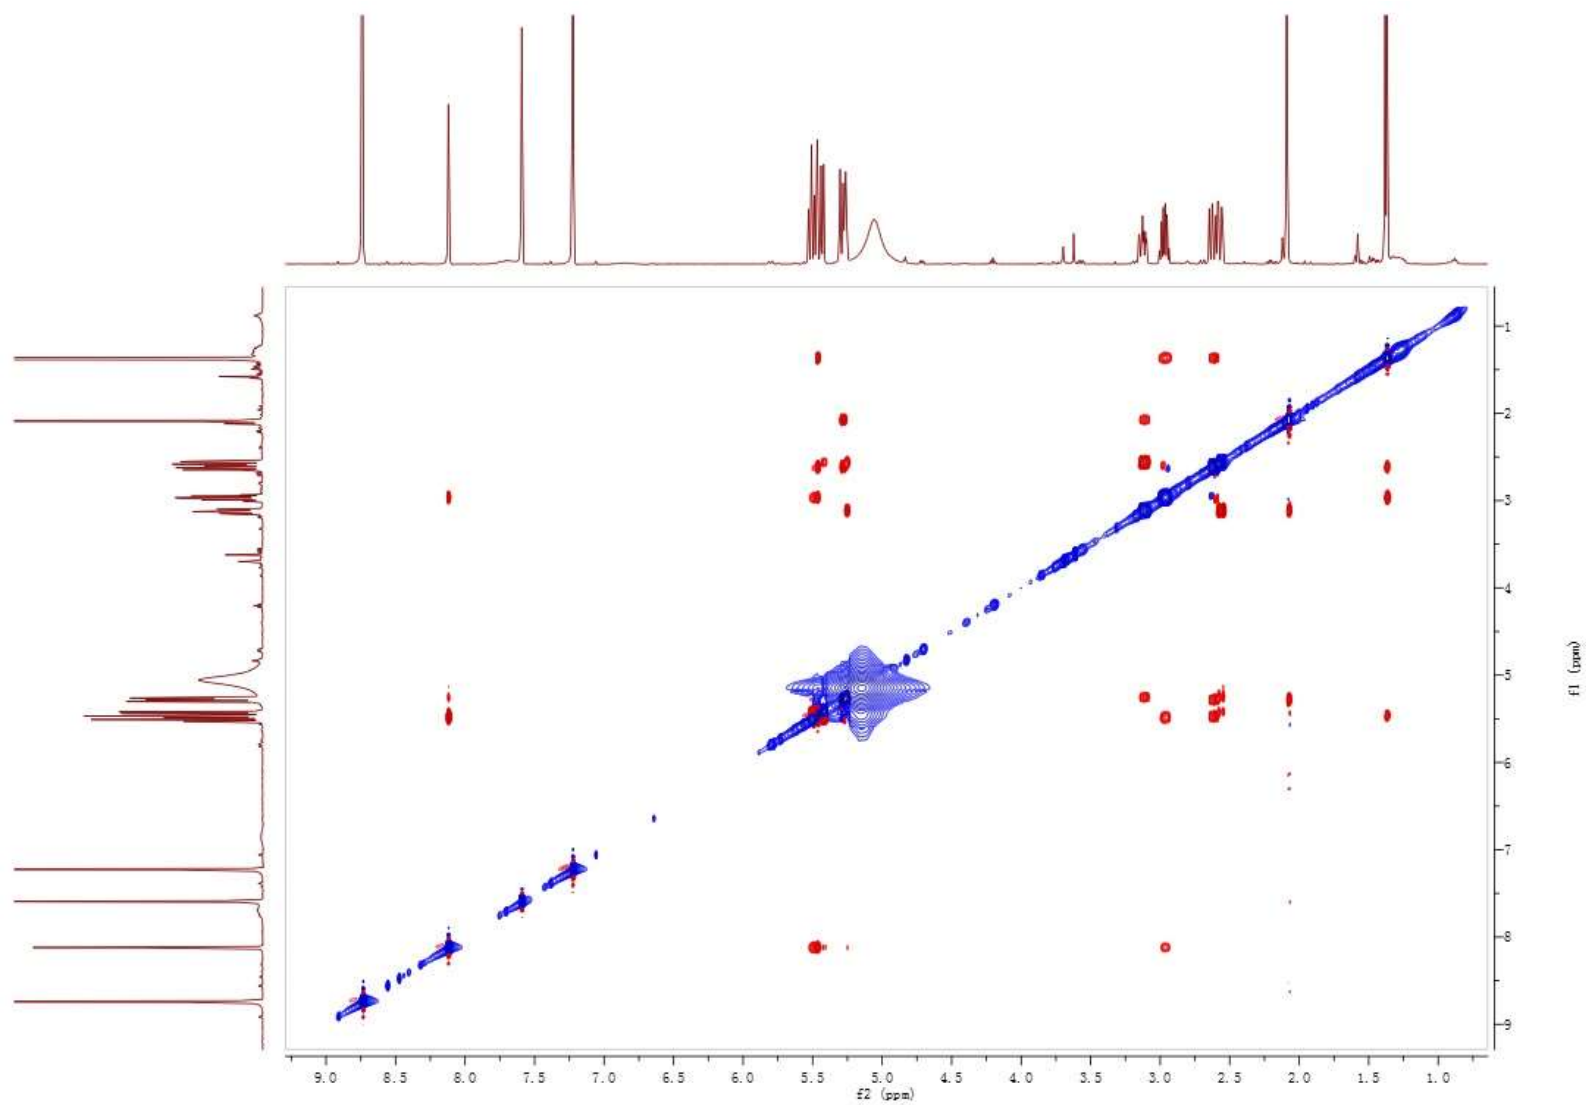

# HR-ESI-MS(-) of compound 4

## Mass Spectrum SmartFormula Report

### Analysis Info

|               |                                                          |                   |          |
|---------------|----------------------------------------------------------|-------------------|----------|
| Analysis Name | D:\Data\MS\data\202101\donglimei_E9-4-3_neg_34_01_1352.d |                   |          |
| Method        | LC_Direct Infusion_neg_100-1000mz.m                      | Operator          | SCSIO    |
| Sample Name   | donglimei_E9-4-3_neg                                     | Instrument / Ser# | maXis 29 |
| Comment       |                                                          |                   |          |

### Acquisition Parameter

|             |          |                       |           |                  |           |
|-------------|----------|-----------------------|-----------|------------------|-----------|
| Source Type | ESI      | Ion Polarity          | Negative  | Set Nebulizer    | 0.4 Bar   |
| Focus       | Active   | Set Capillary         | 3800 V    | Set Dry Heater   | 180 °C    |
| Scan Begin  | 100 m/z  | Set End Plate Offset  | -500 V    | Set Dry Gas      | 4.0 l/min |
| Scan End    | 2000 m/z | Set Collision Cell RF | 550.0 Vpp | Set Divert Valve | Waste     |

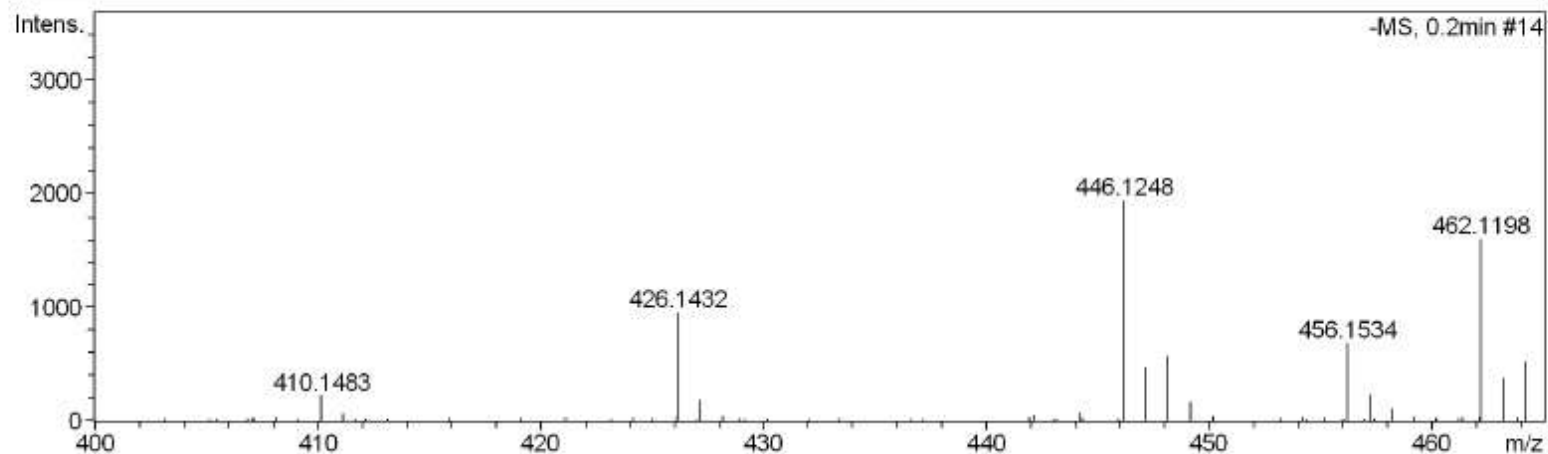

| Meas. m/z | # | Formula              | Score  | m/z      | err [ppm] | err [mDa] | mSigma | rdB  | e <sup>-</sup> Conf | N-Rule |
|-----------|---|----------------------|--------|----------|-----------|-----------|--------|------|---------------------|--------|
| 410.1483  | 1 | C 21 H 16 N 9 O      | 100.00 | 410.1483 | 0.0       | 0.0       | 12.9   | 18.5 | even                | ok     |
| 446.1248  | 1 | C 20 H 21 Cl N 5 O 5 | 100.00 | 446.1237 | -2.6      | -1.2      | 27.3   | 12.5 | even                | ok     |

$^1\text{H}$ -NMR spectrum of compound **4**

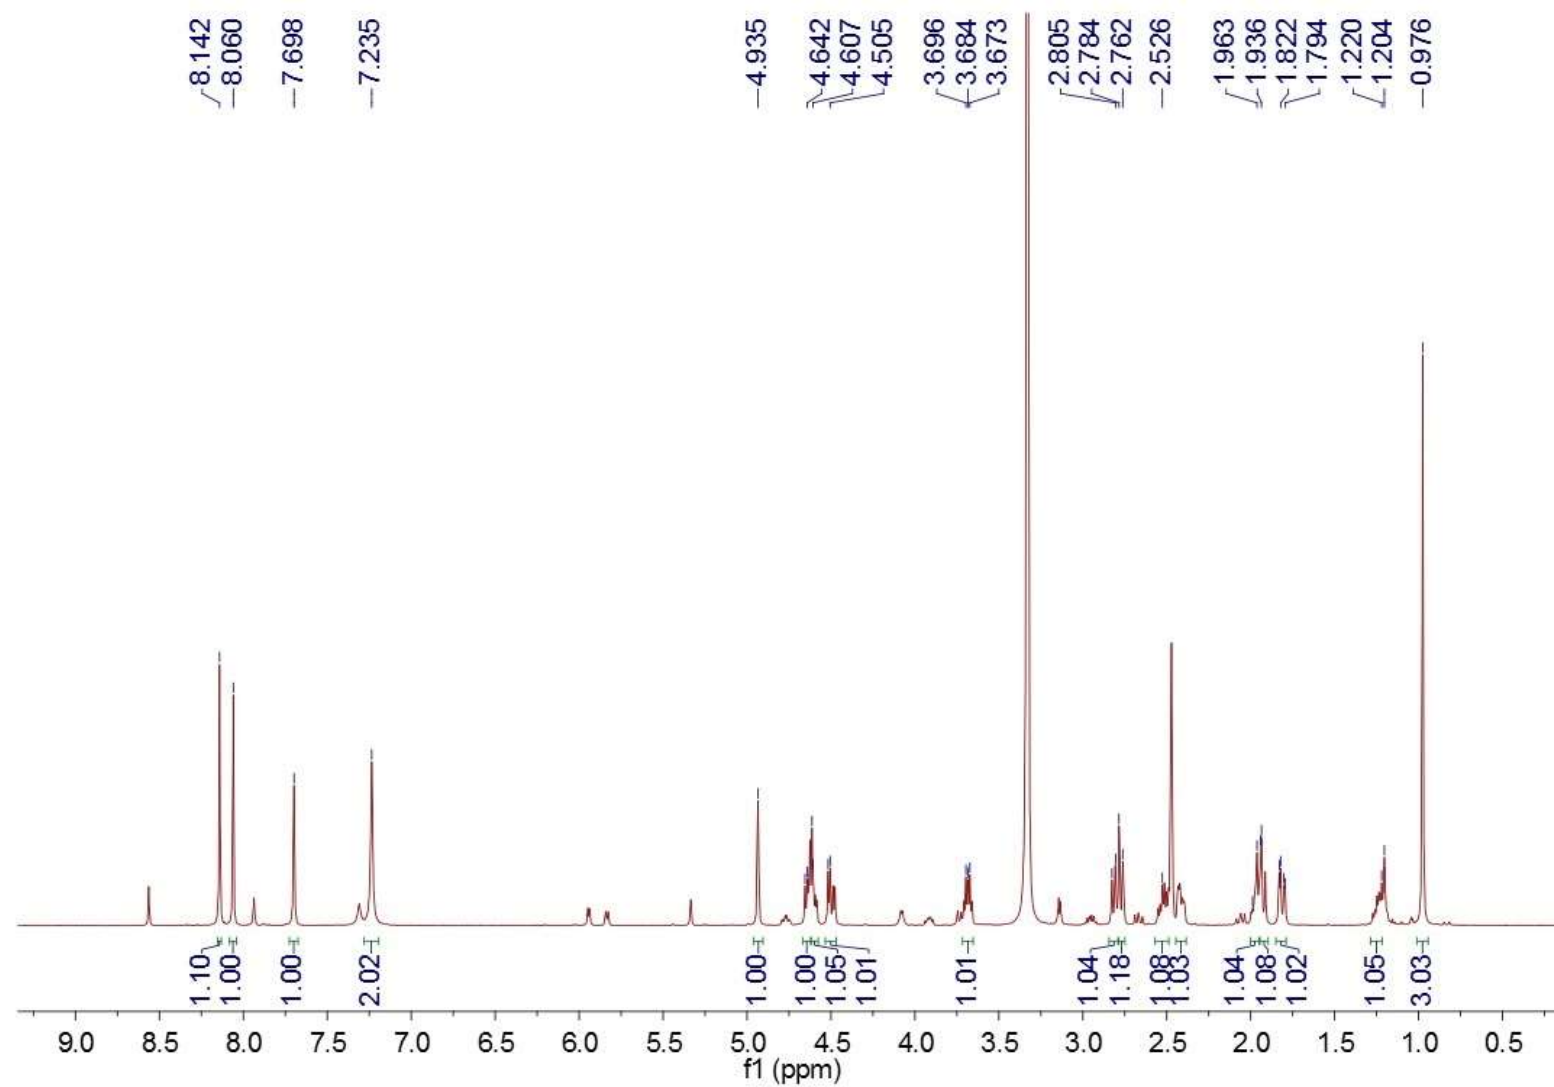



$^{13}\text{C}$ -NMR spectrum of compound **4**

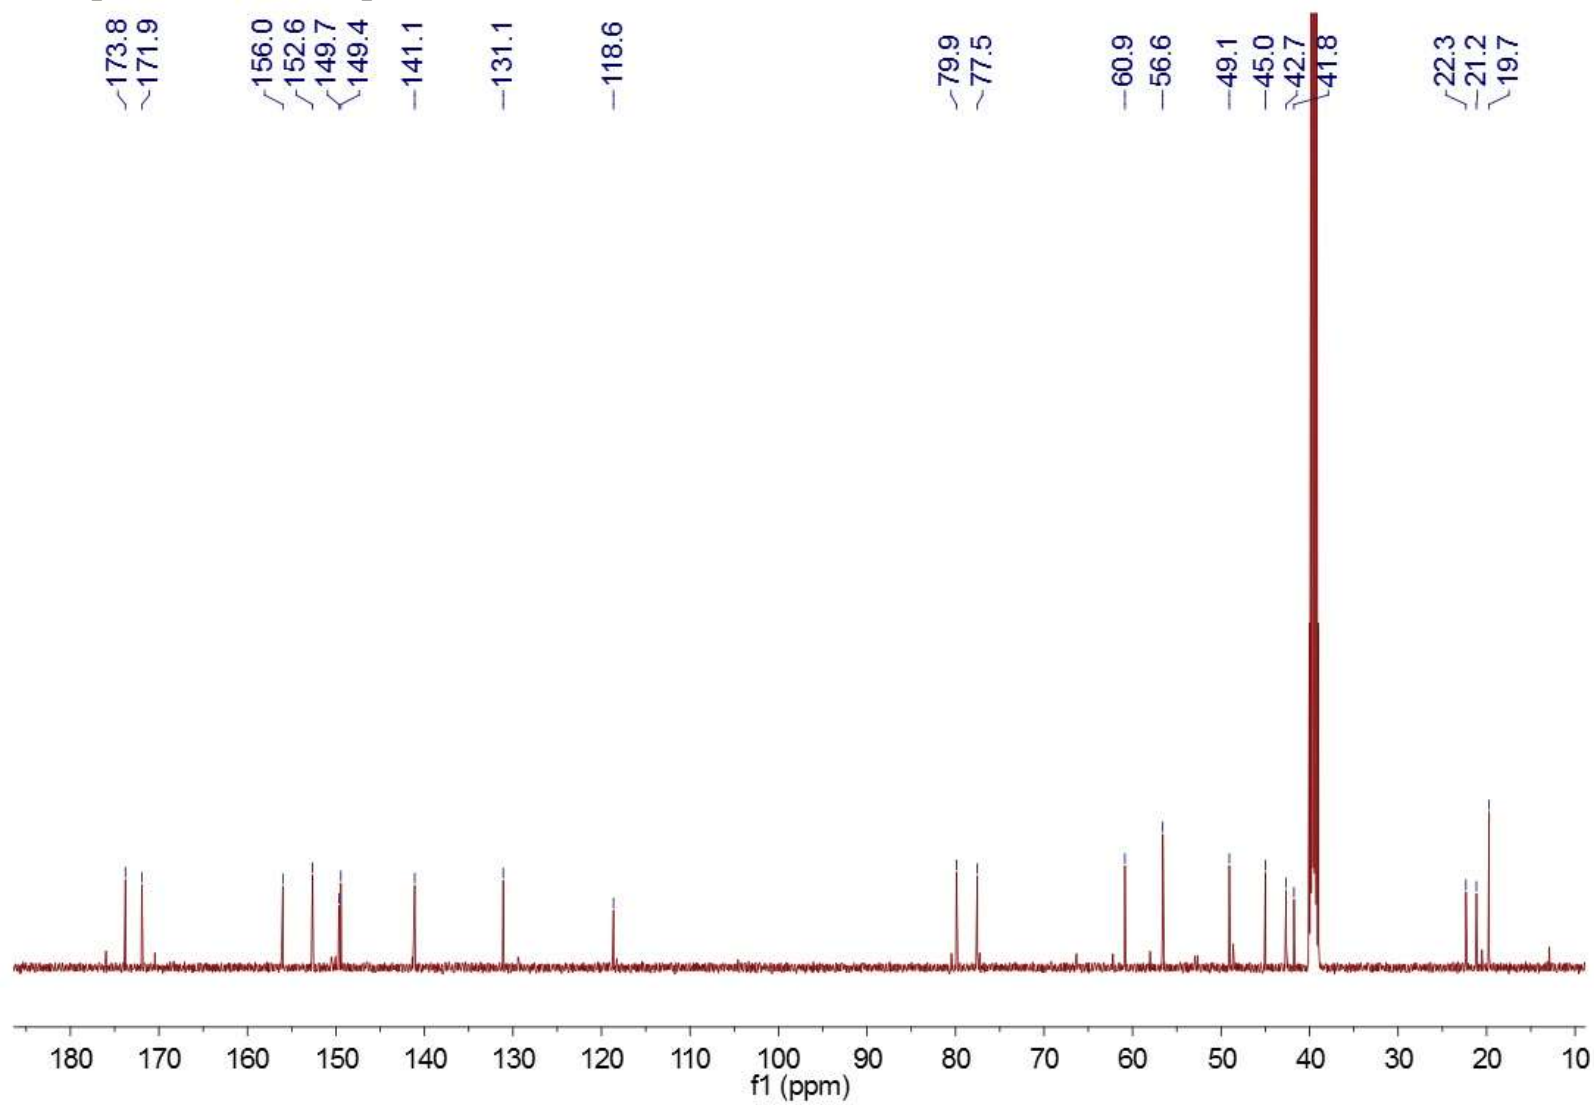

## HSQC spectrum of compound 4

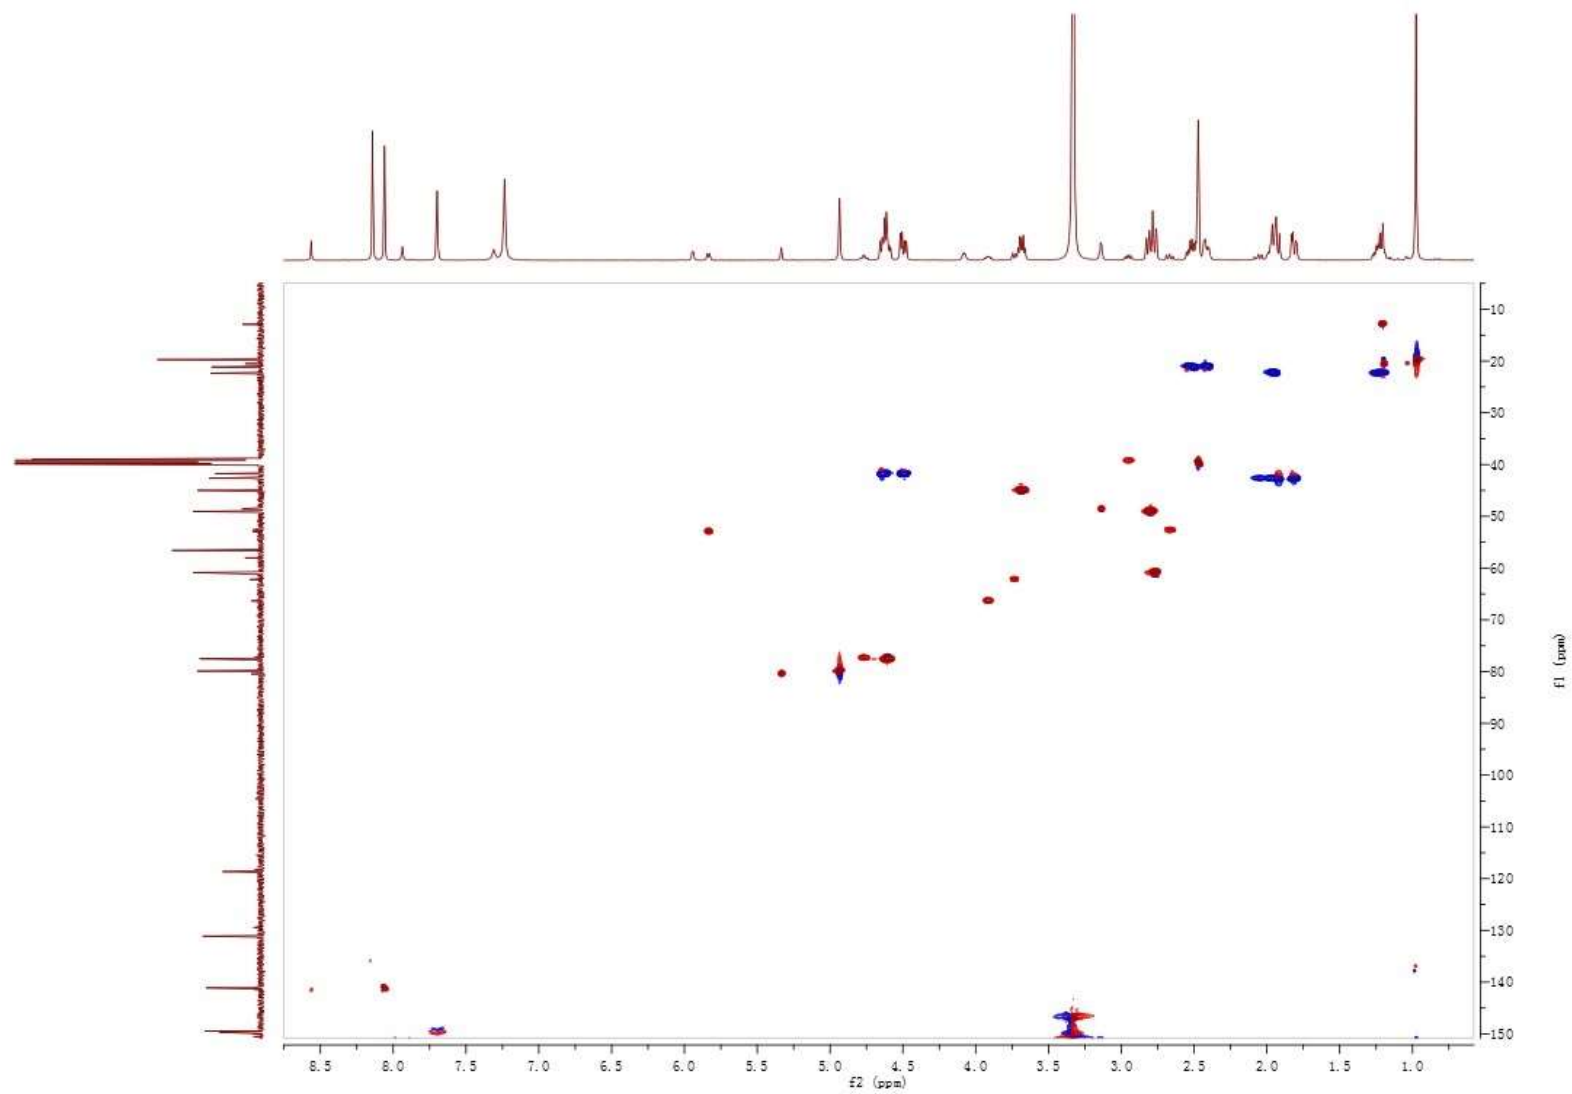

$^1\text{H}$ - $^1\text{H}$  COSY spectrum of compound 4

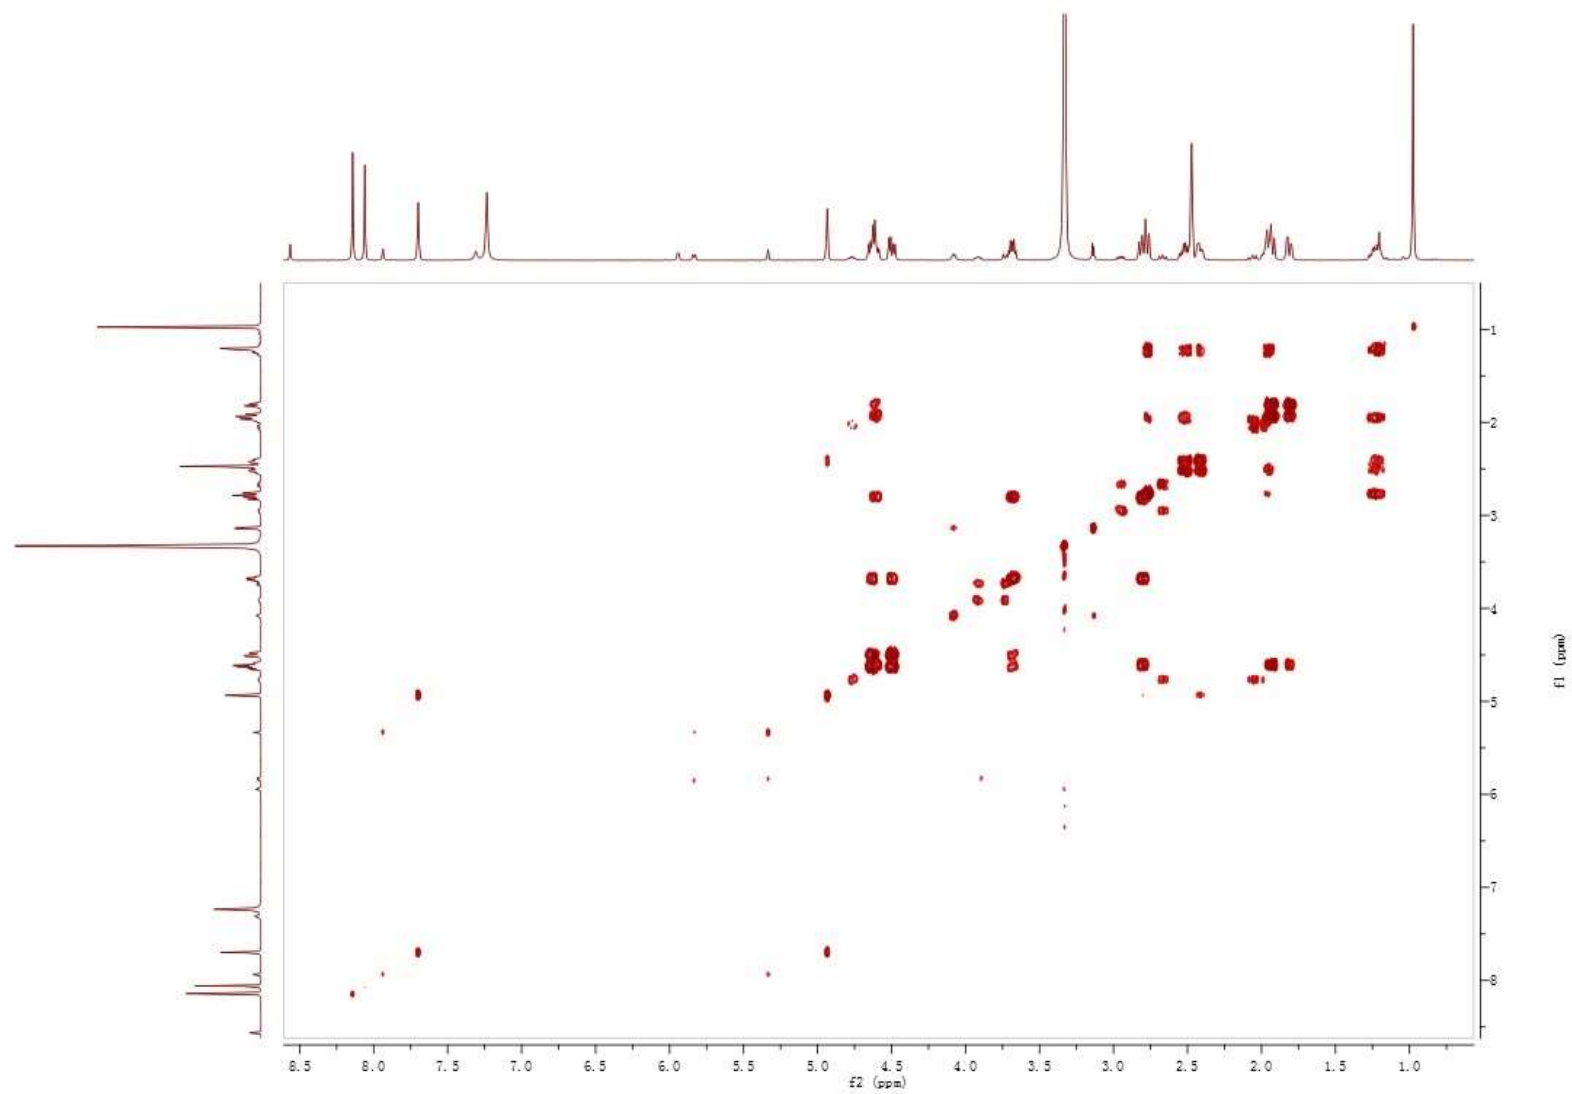

# HMBC spectrum of compound 4

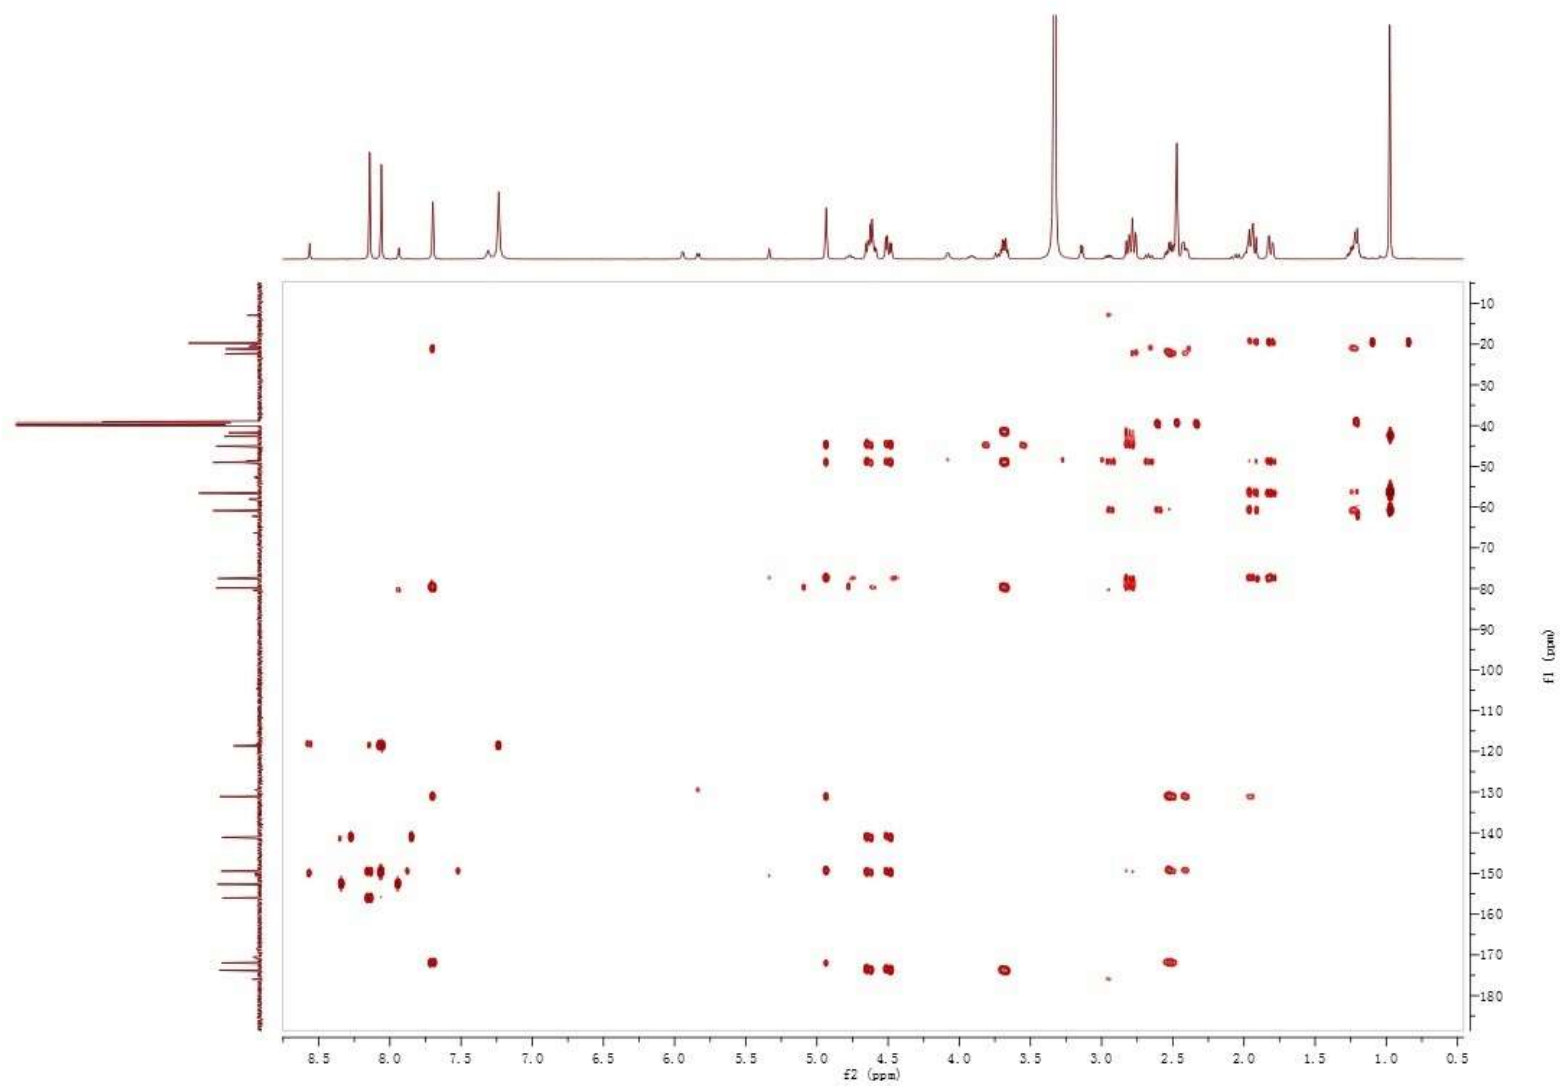

# NOESY spectrum of compound 4

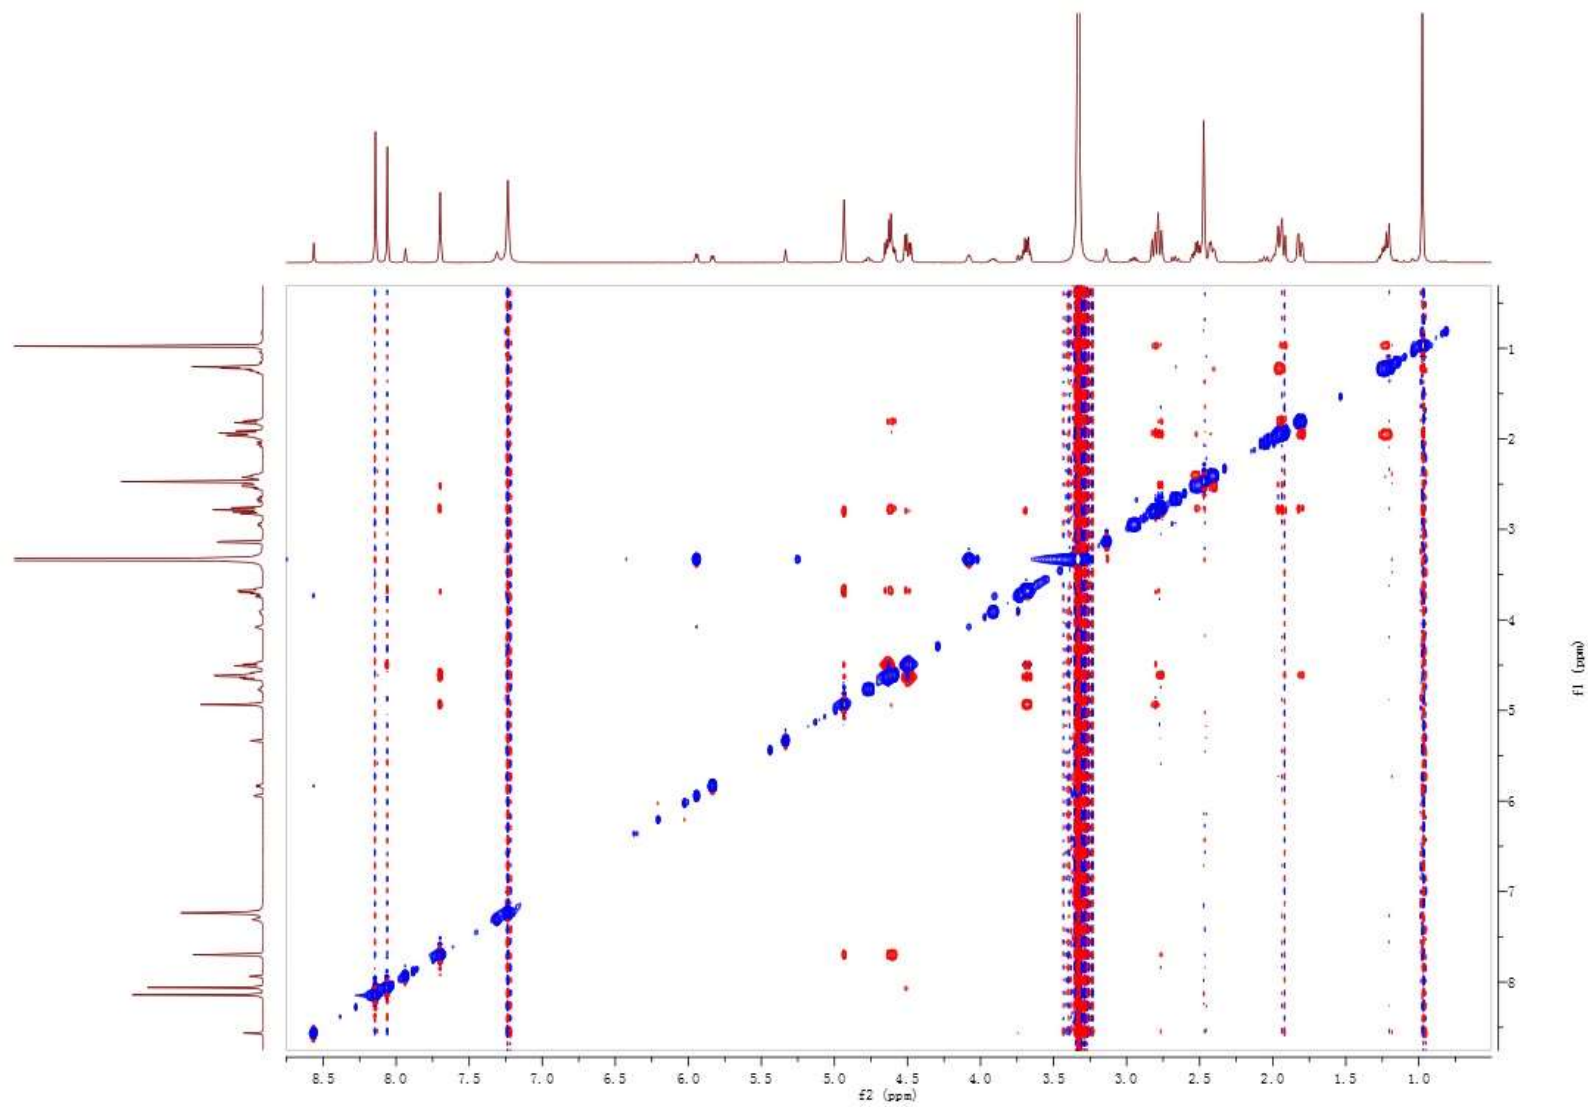

Supplement: s1 [file s1]
